# Supplementary material for: 3-Perfluoroalkylated fluorescent coumarin dyes: rational molecular design and photophysical properties
Source: Royal Society of Chemistry journal article supplement (doi:10.1039/d4me00006d), 2024-01-01
Supplement: d4me00006d1.pdf [file d4me00006d1.pdf]

## Supplementary Information

### 3-Perfluoroalkylated fluorescent coumarin dyes: Rational molecular design and photophysical properties

Ayano Ikemura,<sup>a</sup> Yukiko Karuo,<sup>b</sup> Yuki Uehashi,<sup>a</sup> Tonohiro Agou,<sup>c</sup> Masahiro Ebihara,<sup>a</sup> Yasuhiro Kubota,<sup>a</sup> Toshiyasu Inuzuka,<sup>d</sup> Masaaki Omote,<sup>b\*</sup> and Kazumasa Funabiki<sup>a\*</sup>

<sup>a</sup> Department of Chemistry and Biomolecular Science, Gifu University, 1-1 Yanagido, Gifu, Gifu 501-1193, Japan.

<sup>b</sup> Faculty of Pharmaceutical Sciences, Setsunan University, 45-1, Nagaotoge-cho, Hirakata, Osaka 573-0101, Japan

<sup>c</sup> Department of Material Science, Graduate School of Science, University of Hyogo, 3-2-1 Koto, Kamigori, Ako, Hyogo 678-1297, Japan

<sup>d</sup> Division of Instrumental Analysis, Life Science Research Center, Gifu University, 1-1 Yanagido, Gifu, Gifu 501-1193, Japan

\*Corresponding Author. E-mail: omote@pharm.setsunan.ac.jp, funabiki.kazumasa.m6@f.gifu-u.ac.jp

#### (Contents)

|                                                                                       |           |
|---------------------------------------------------------------------------------------|-----------|
| <sup>1</sup> H, <sup>13</sup> C, <sup>19</sup> F NMR, IR and HRMS for <b>3</b> .....  | p.S2-S3   |
| <sup>1</sup> H, <sup>13</sup> C, <sup>19</sup> F NMR, IR and HRMS for <b>4a</b> ..... | p.S4-S6   |
| <sup>1</sup> H, <sup>13</sup> C, <sup>19</sup> F NMR, IR and HRMS for <b>4b</b> ..... | p.S7-S9   |
| <sup>1</sup> H, <sup>13</sup> C, <sup>19</sup> F NMR, IR and HRMS for <b>5a</b> ..... | p.S10-S12 |
| <sup>1</sup> H, <sup>13</sup> C, <sup>19</sup> F NMR, IR and HRMS for <b>5b</b> ..... | p.S13-S15 |
| Fluorescence decay curves.....                                                        | p.S16-S25 |
| ORTEP diagram of <b>1</b> .....                                                       | p.S26     |
| Crystal data and structure refinement for <b>1</b> .....                              | p.S26-S27 |
| ORTEP diagram of <b>2</b> .....                                                       | p.S28     |
| Crystal data and structure refinement for <b>2</b> .....                              | p.S28-S29 |
| ORTEP diagram of <b>4a</b> .....                                                      | p.S30     |
| Crystal data and structure refinement for <b>4a</b> .....                             | p.S30-S31 |
| ORTEP diagram of <b>4b</b> .....                                                      | p.S32     |
| Crystal data and structure refinement for <b>4b</b> .....                             | p.S32-S33 |
| ORTEP diagram of <b>5a</b> .....                                                      | p.S34     |
| Crystal data and structure refinement for <b>5a</b> .....                             | p.S34-S35 |
| ORTEP diagram of <b>5b</b> .....                                                      | p.S36     |
| Crystal data and structure refinement for <b>5b</b> .....                             | p.S36-S37 |
| Computational calculation data.....                                                   | p.S38-S57 |

### 7-benzyloxy-3-iodo-2*H*-chromen-2-one (3)

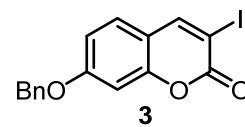

### <sup>1</sup>H NMR

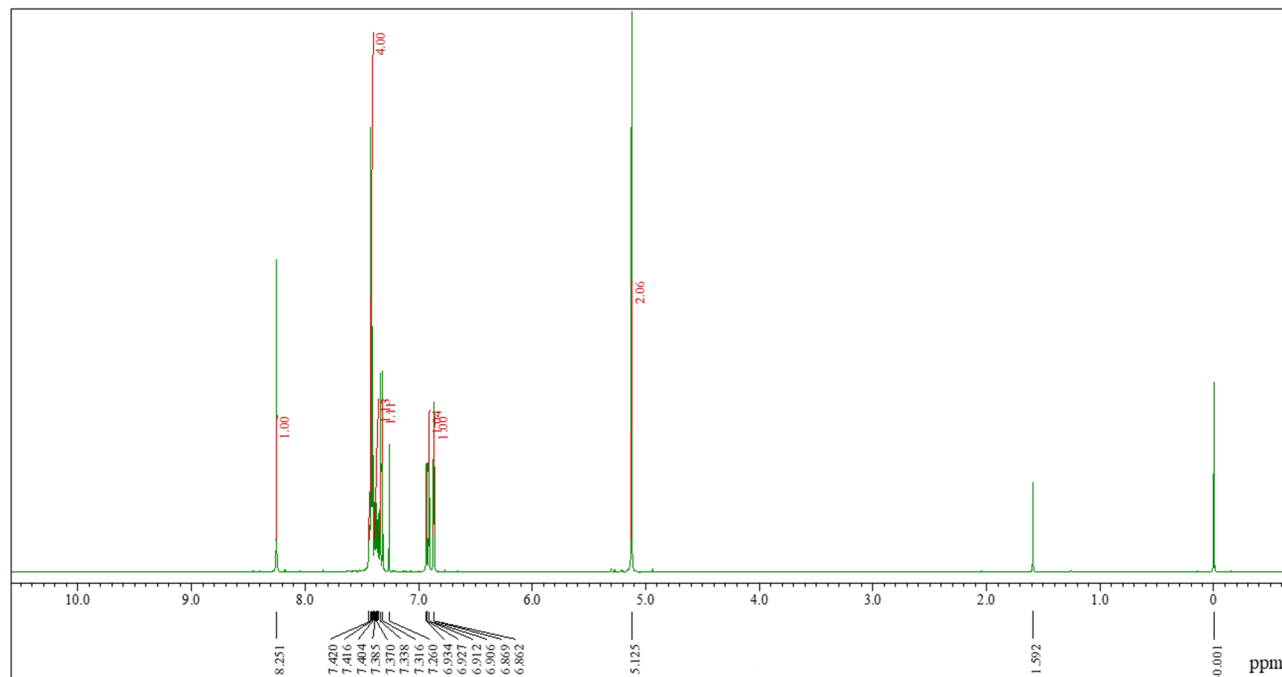

### <sup>13</sup>C NMR

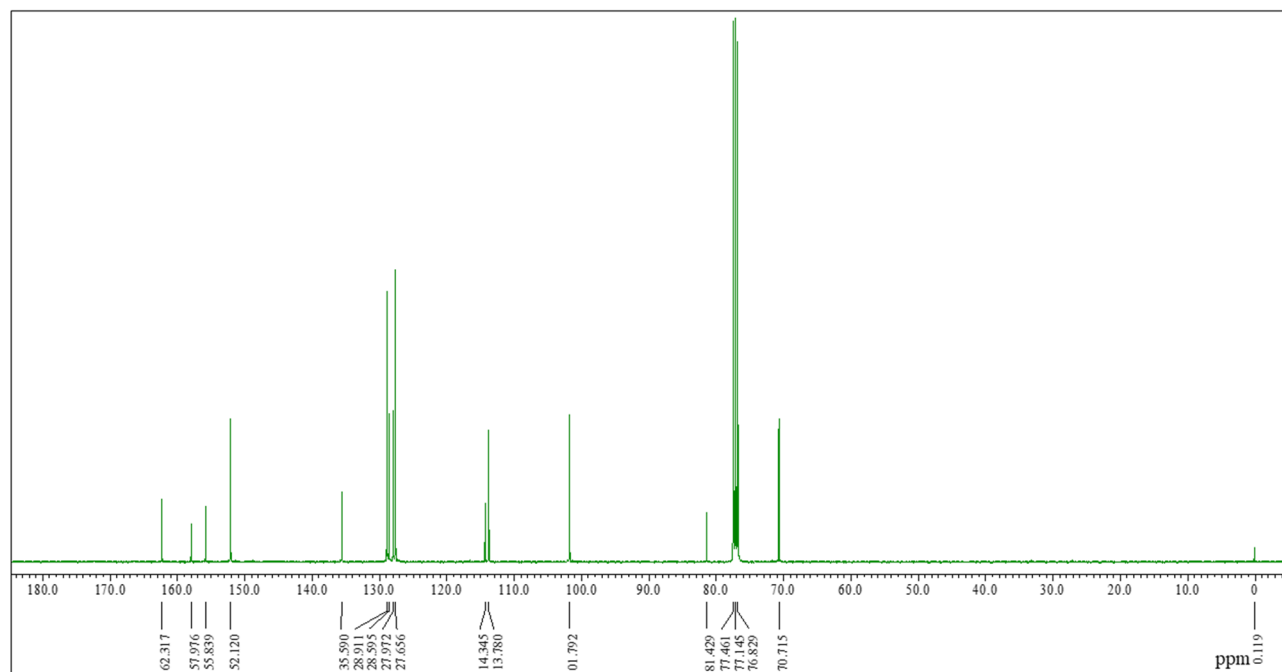

# IR

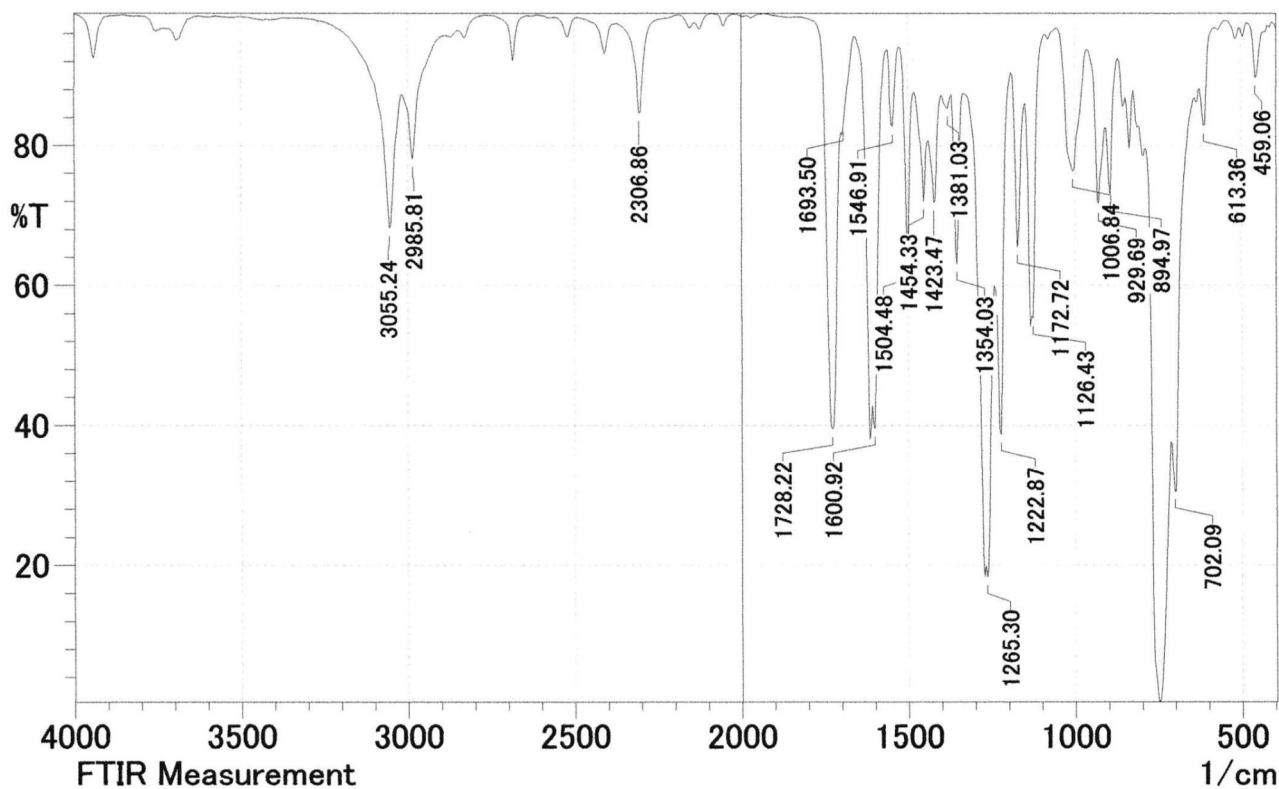

# HRMS

[ Mass Spectrum ]  
 Date : 13-Oct-2022 13:44  
 Data : MS-975  
 Sample: YK018-655column-4  
 Note : 30eV 300uA 200 deg.  
 Inlet : Direct Ion Mode : EI+  
 Spectrum Type : Normal Ion [MF-Linear]  
 RT : 0.92 min Scan# : (11,14)  
 BP : m/z 91.0000 Int. : 544.87  
 Output m/z range : 50.0000 to 500.0000 Cut Level : 0.00 %

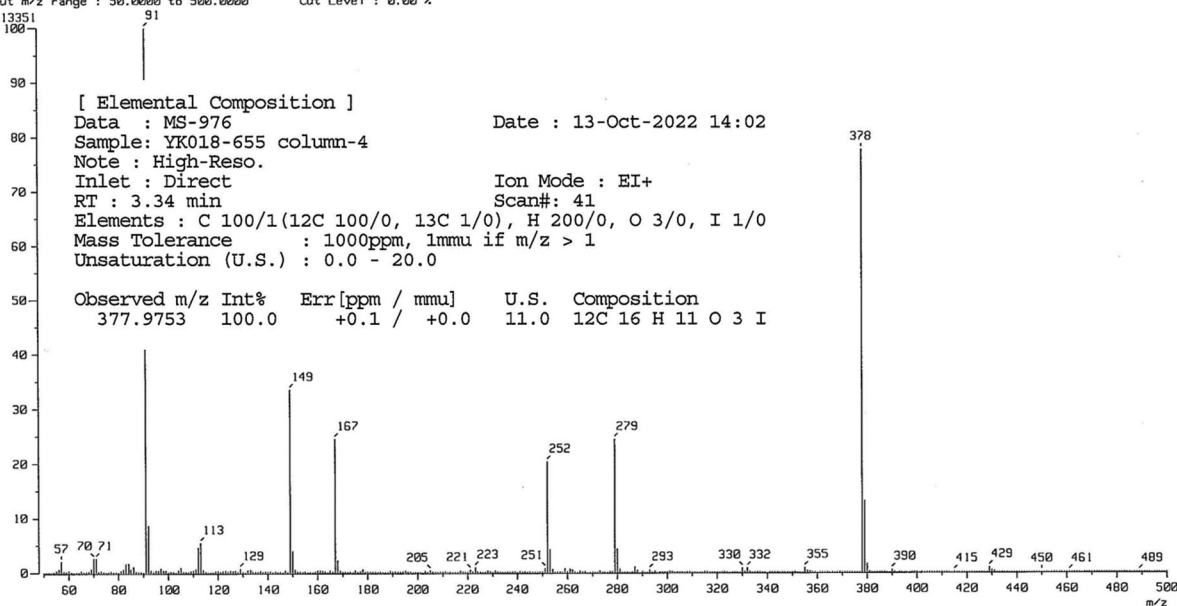

# 7-benzyloxy-3-trifluoromethyl-2H-chromen-2-one (4a)

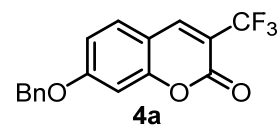

## <sup>1</sup>H NMR

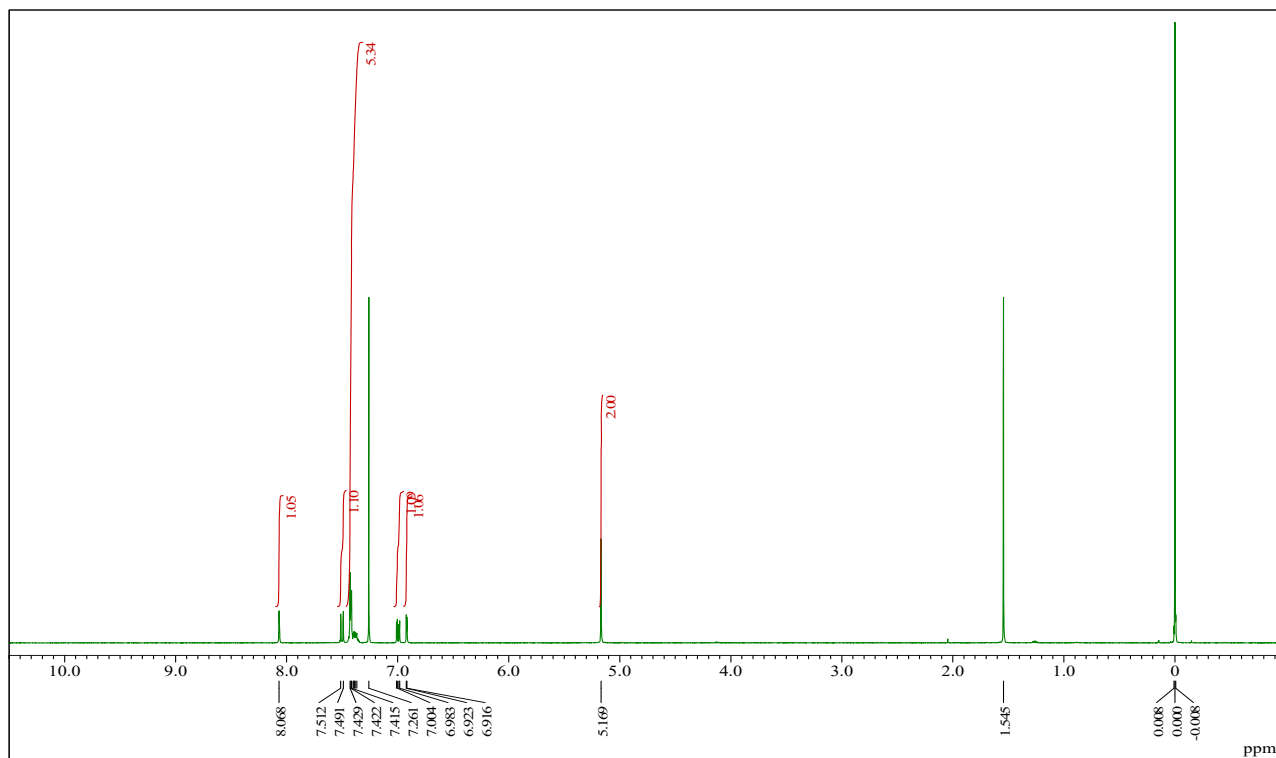

## <sup>13</sup>C NMR

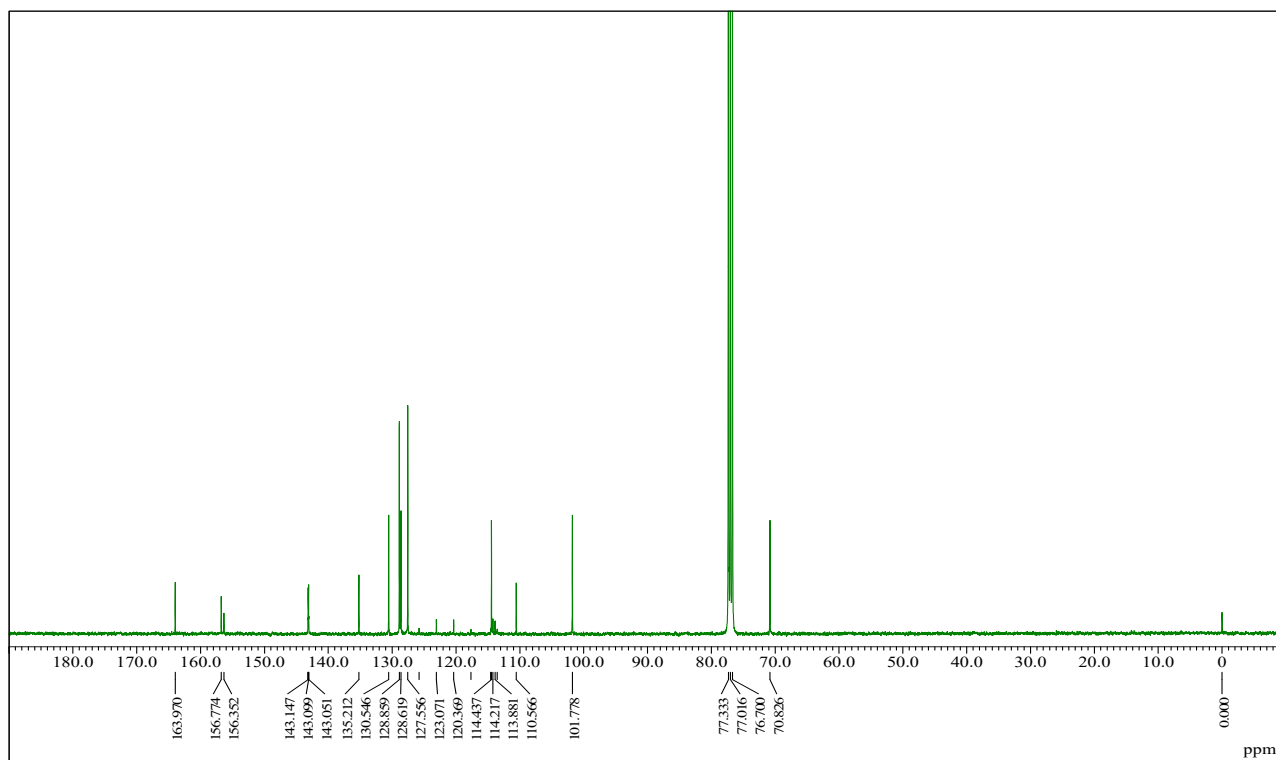

# $^{19}\text{F}$ NMR

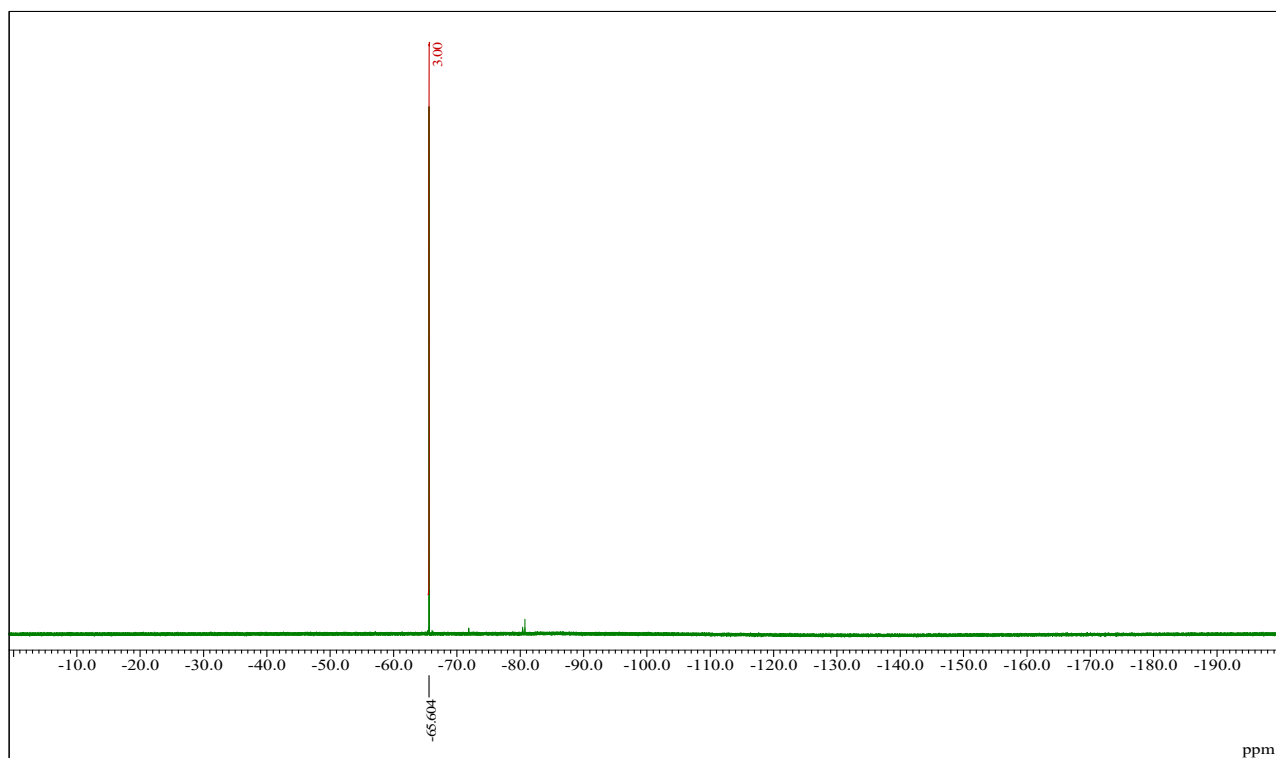

# IR

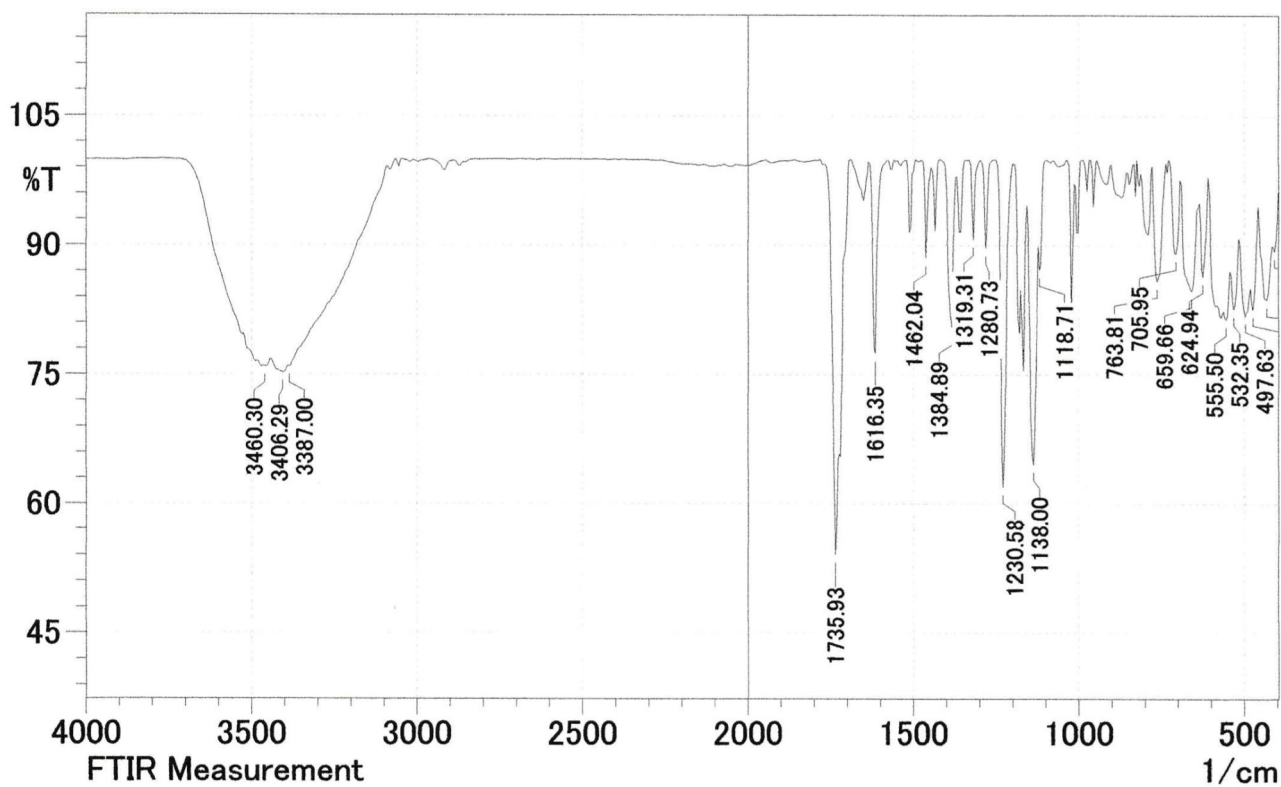

# HRMS

[ Mass Spectrum ]  
Data : MS-440 Date : 15-Oct-2021 10:12  
Sample: YK018-666 column-3  
Note : 30eV 300uA 180deg.  
Inlet : Direct Ion Mode : EI+  
Spectrum Type : Normal Ion [MF-Linear]  
RT : 1.87 min Scan# : (15,19)  
BP : m/z 91.0000 Int. : 1167.42  
Output m/z range : 50.0000 to 500.0000 Cut Level : 0.00 %

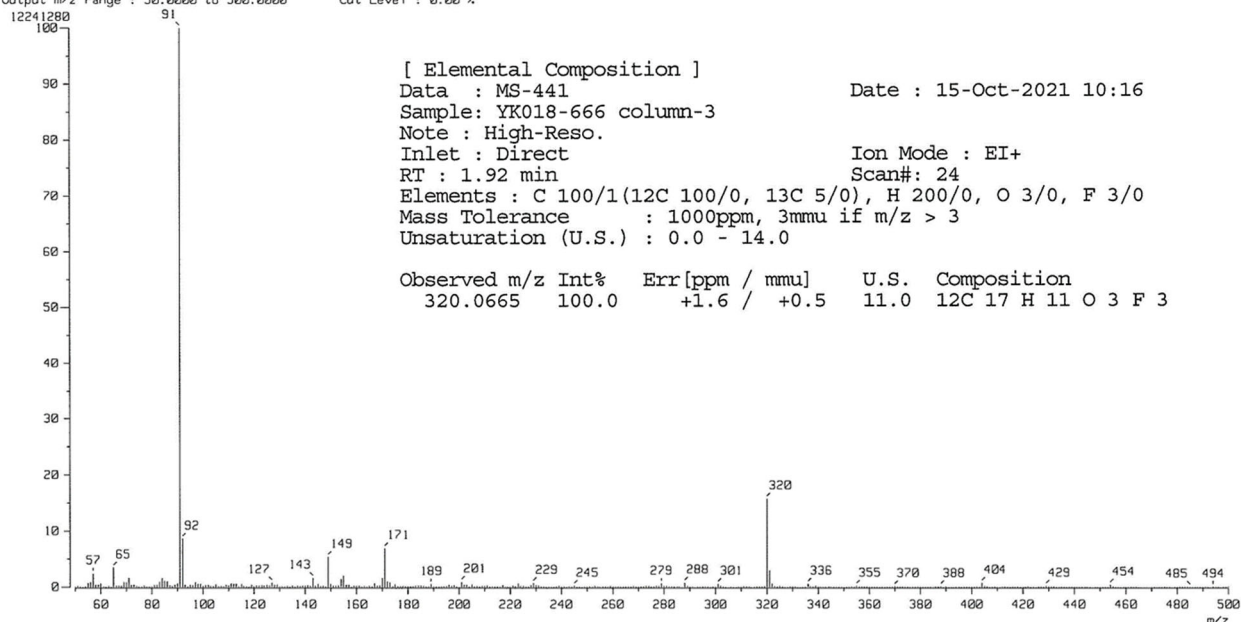

# 7-benzyloxy-3-perfluorobutyl-2H-chromen-2-one (4b)

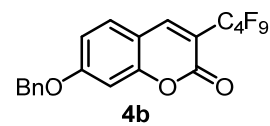

## <sup>1</sup>H NMR

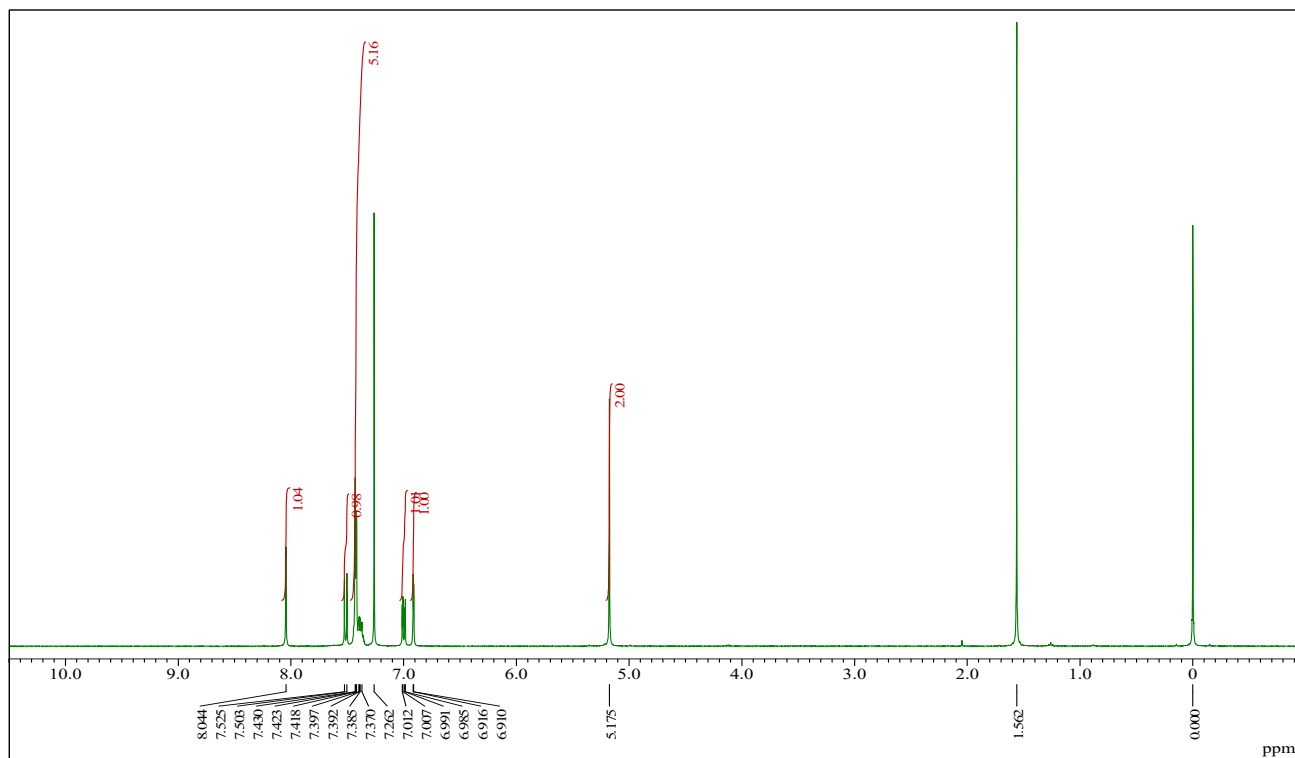

## <sup>13</sup>C NMR

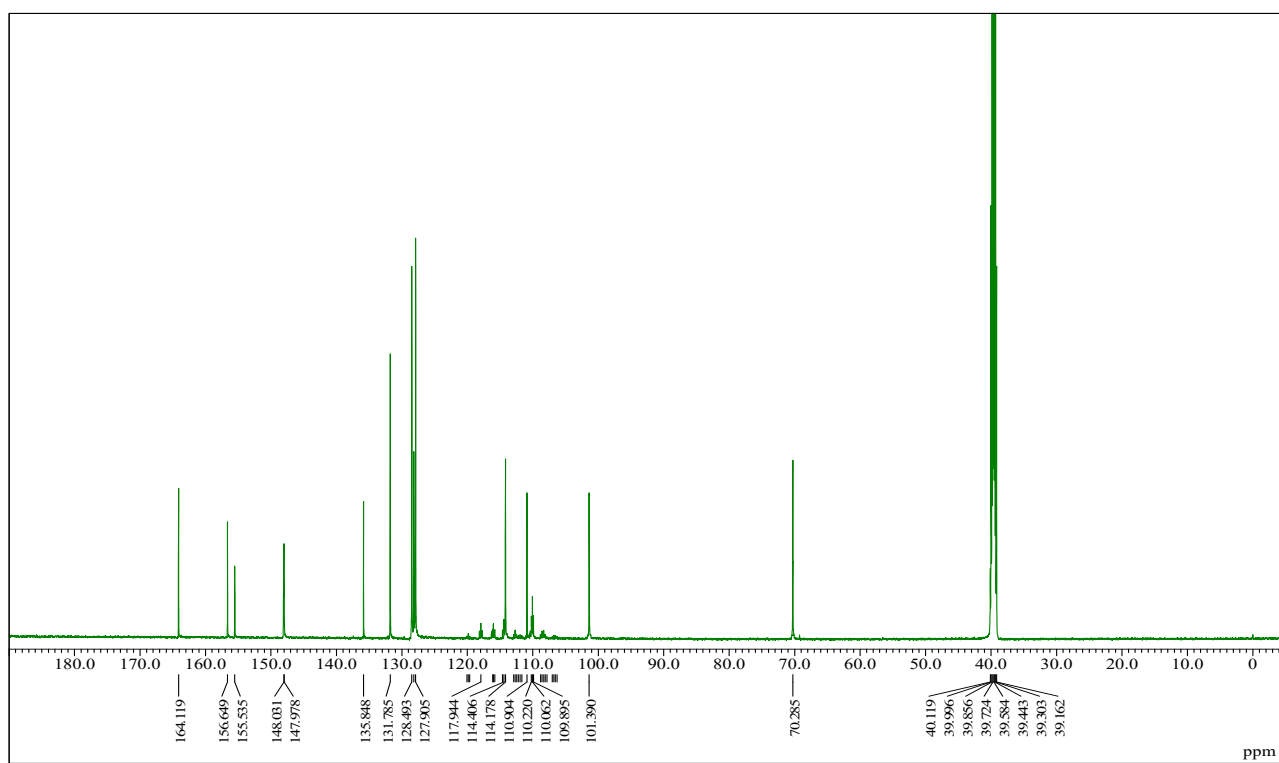

# <sup>19</sup>F NMR

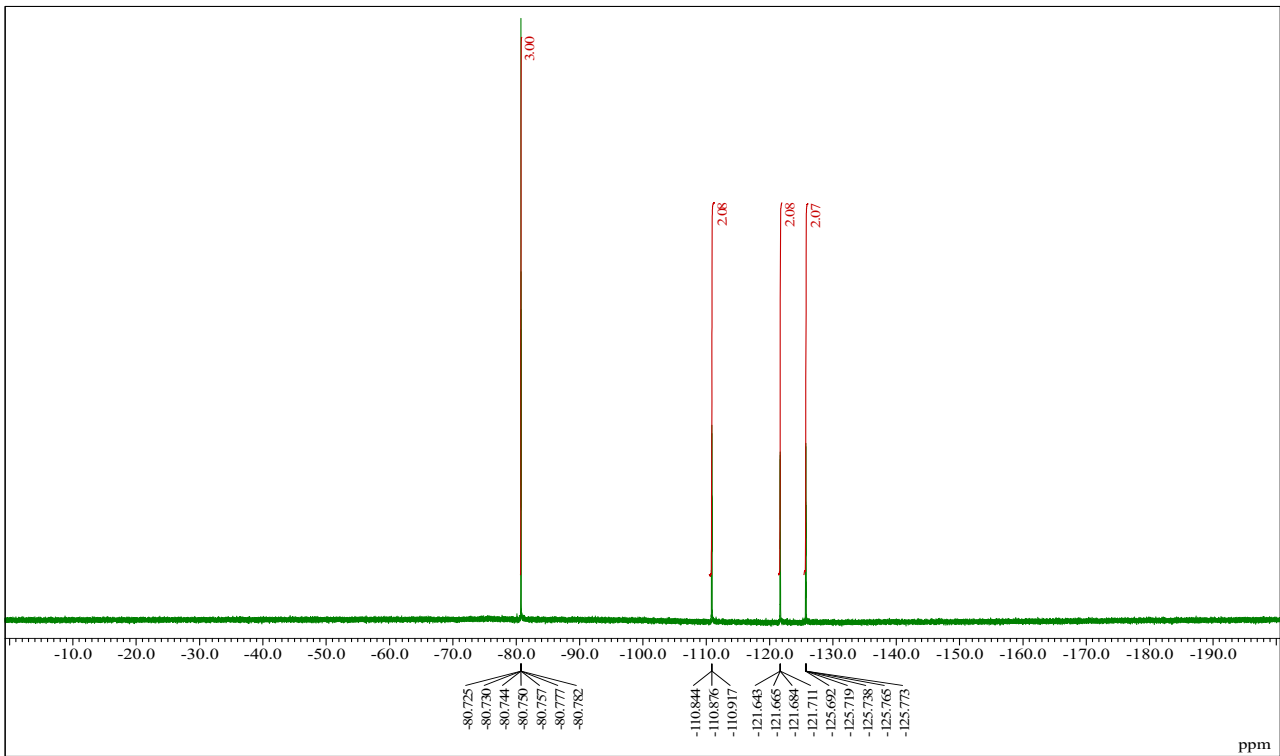

# IR

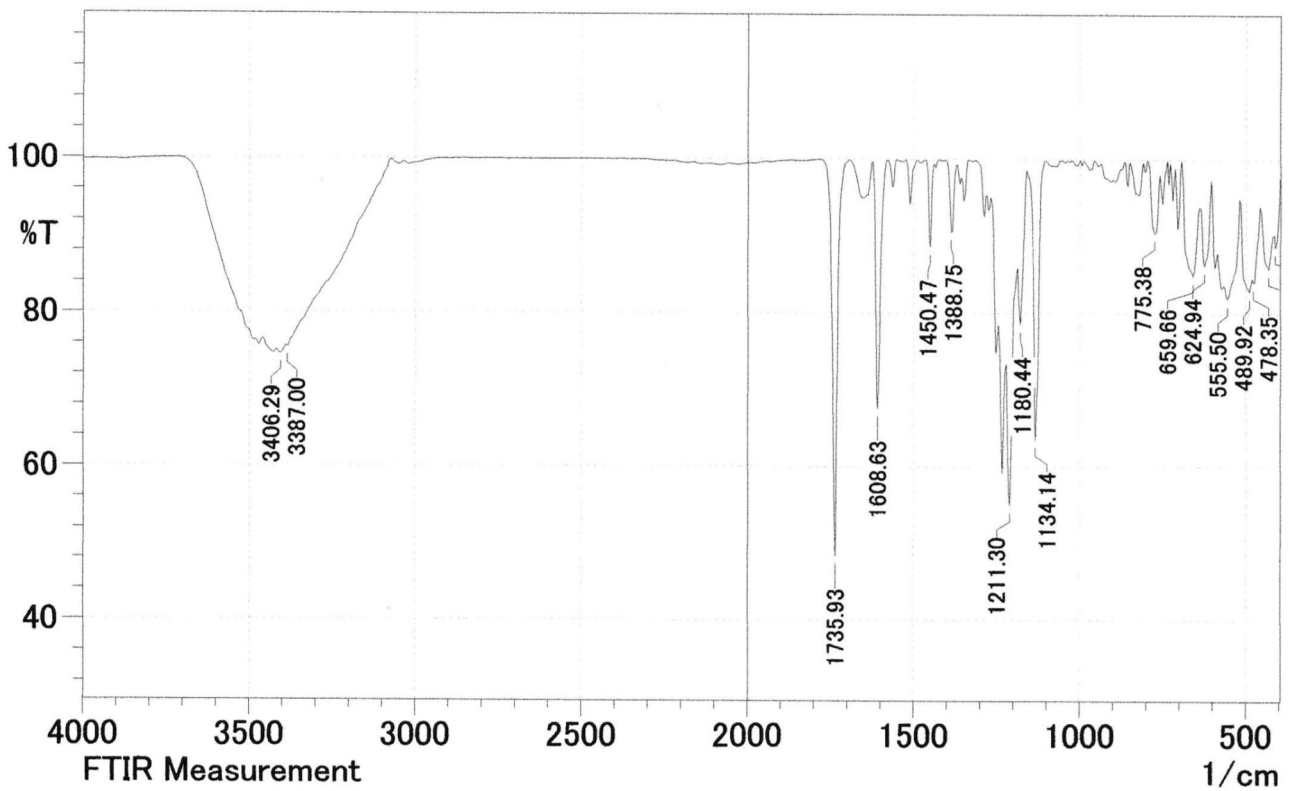



# HRMS

[ Mass Spectrum ]  
 Date : 12-Feb-2021 12:10  
 Data : MS-744  
 Sample: TM019-44  
 Note : 32eV 300uA 180deg.  
 Inlet : Direct Ion Mode : EI+  
 Spectrum Type : Normal Ion [MF-Linear]  
 RT : 0.84 min Scan# : (6,17)  
 BP : m/z 91.0200 Int. : 1359.23  
 Output m/z range : 50.0000 to 600.0000 Cut Level : 0.00 %

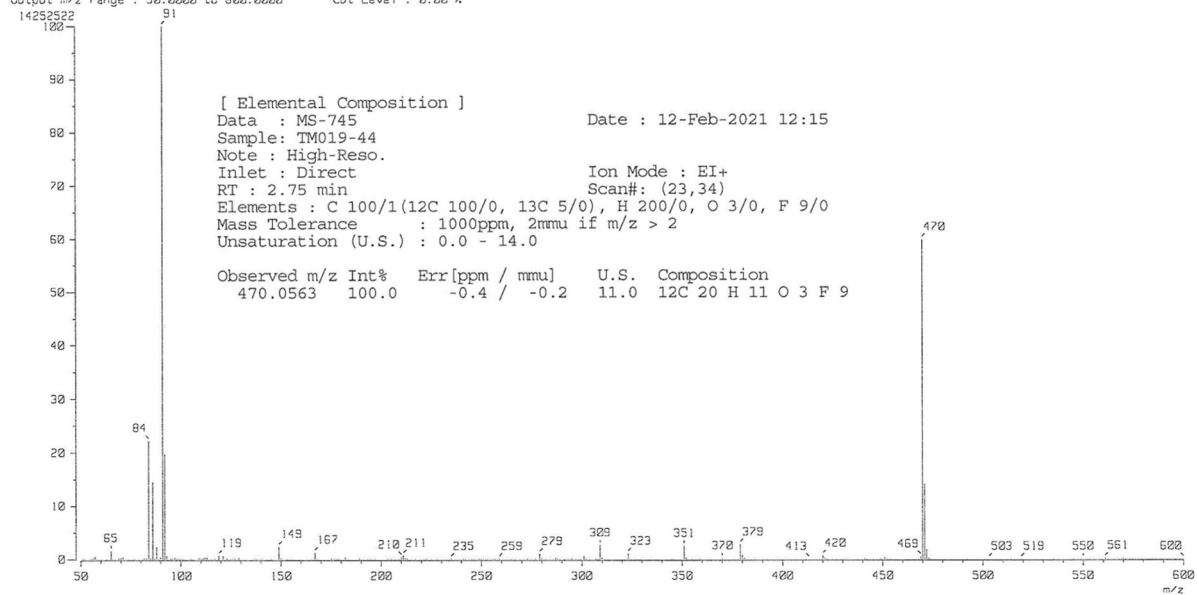

# 7-hydroxy-3-(trifluoromethyl)-2H-chromen-2-one (5a)

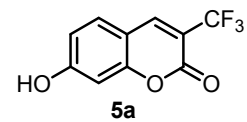

## <sup>1</sup>H NMR

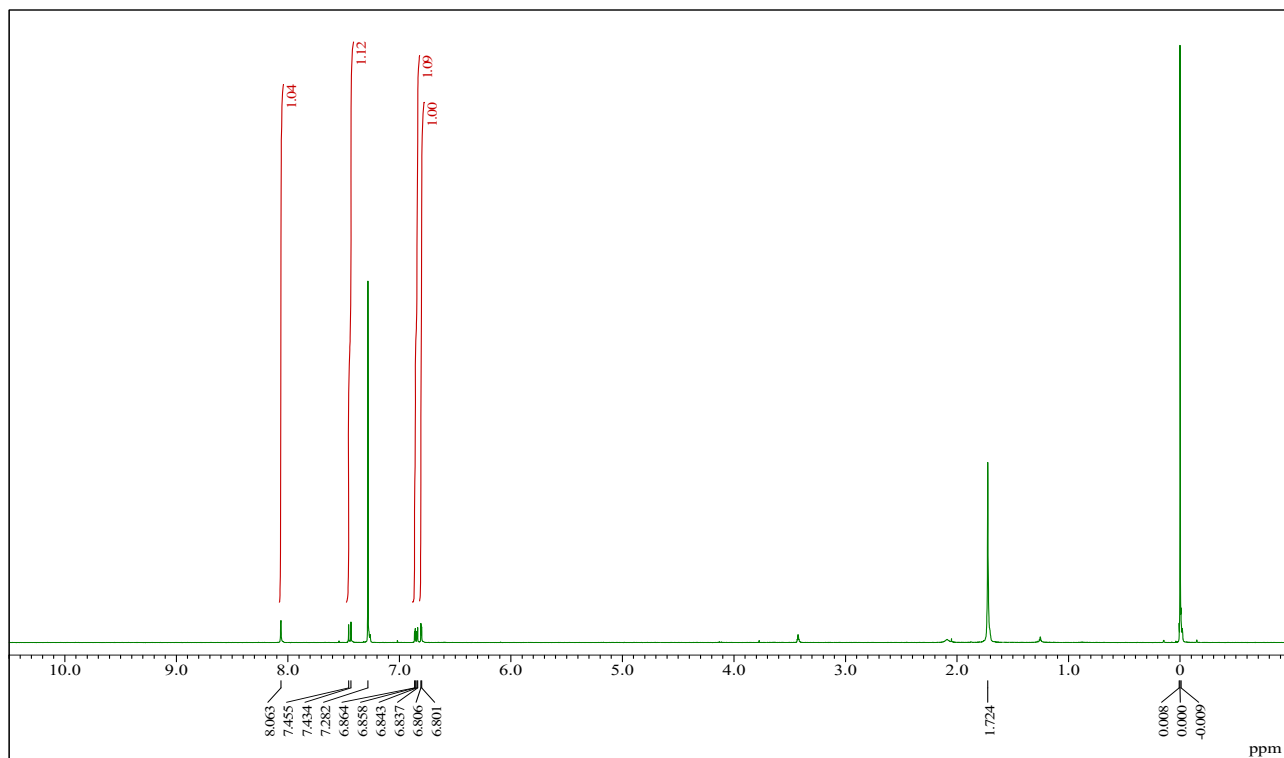

## <sup>13</sup>C NMR

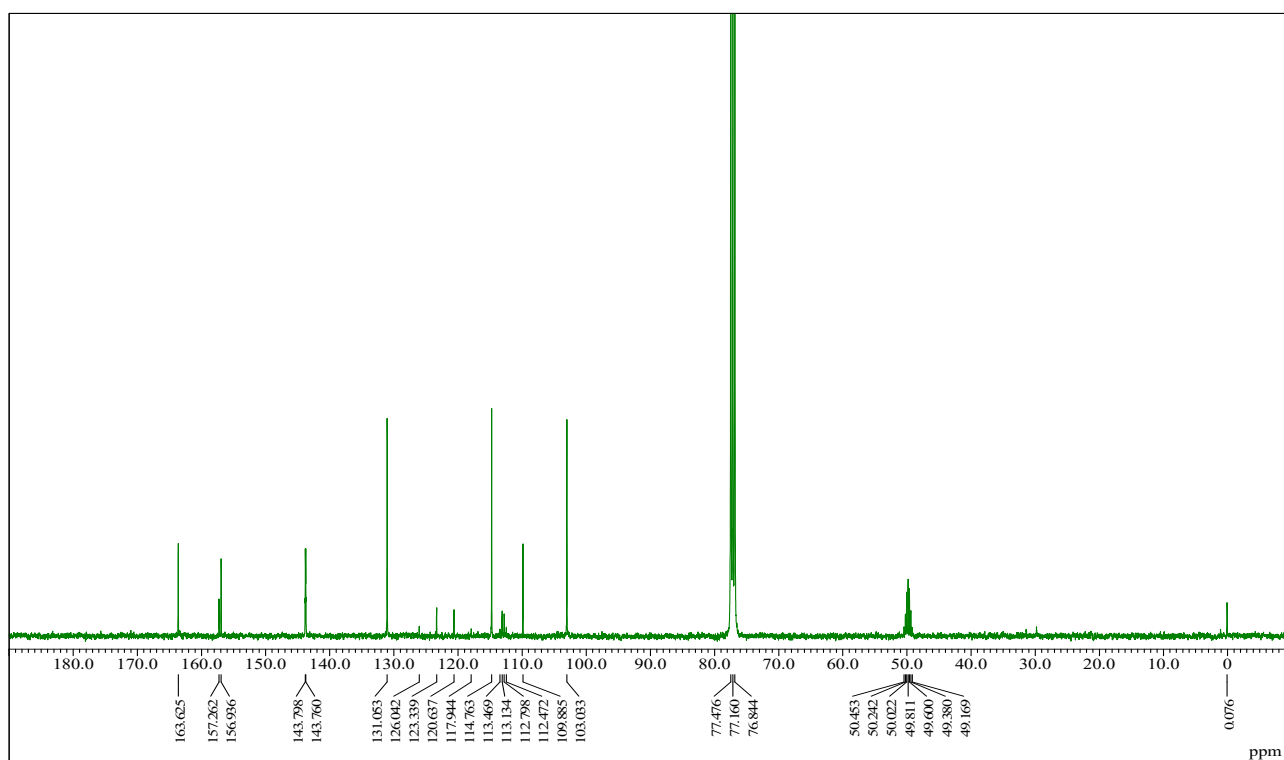

# <sup>19</sup>F NMR

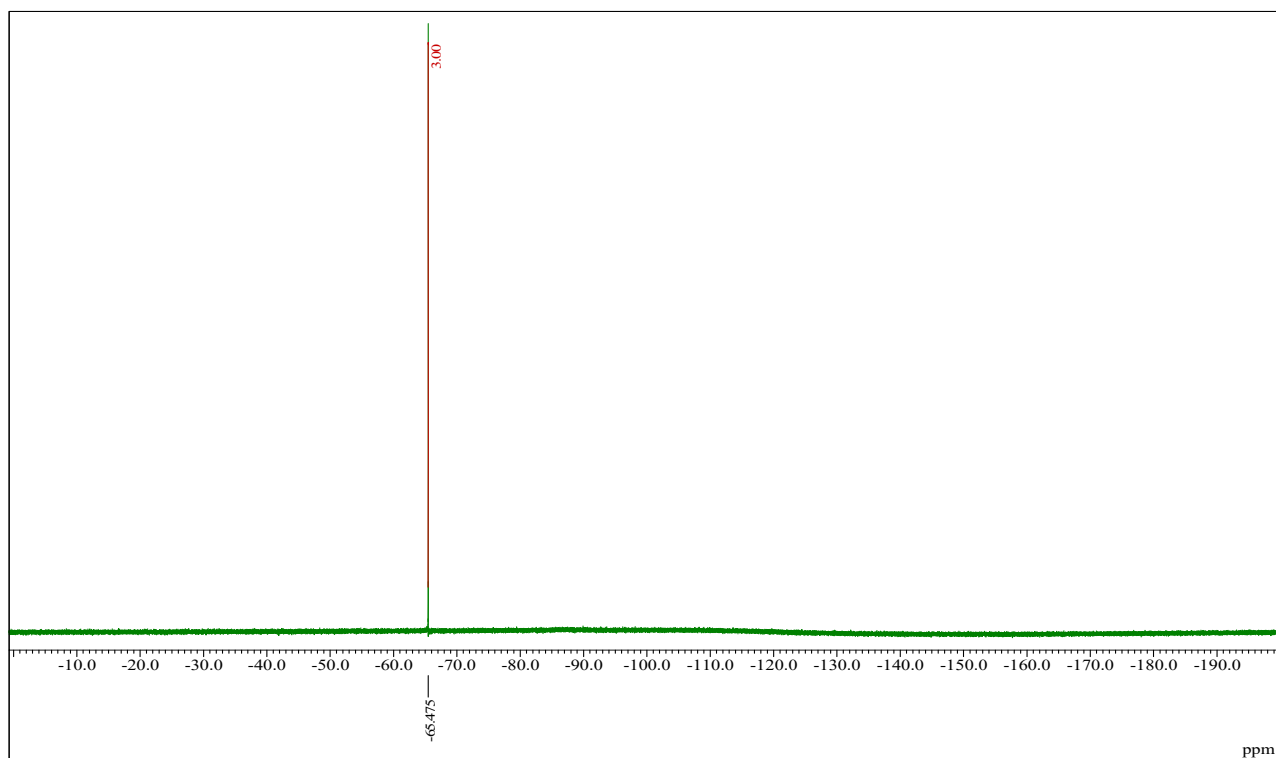

# IR

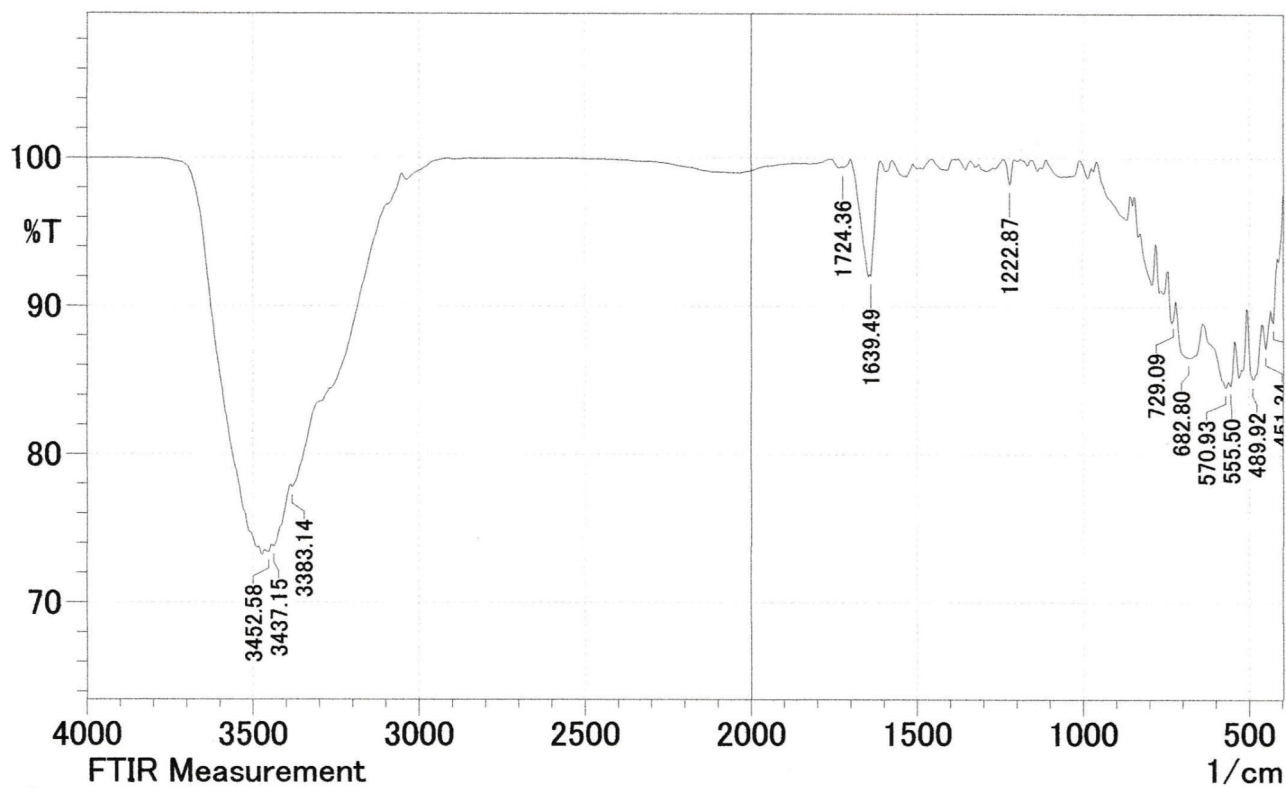

# HRMS

[ Mass Spectrum ]  
 Date : 20-Oct-2021 10:22  
 Data : MS-449  
 Sample: YK018-674 crude  
 Note : 30eV 300uA 200deg.  
 Inlet : Direct Ion Mode : EI+  
 Spectrum Type : Normal Ion [MF-Linear]  
 RT : 1.29 min Scan# : (11,13)  
 BP : m/z 230.0000 Int. : 890.58  
 Output m/z range : 50.0000 to 500.0000 Cut Level : 0.00 %

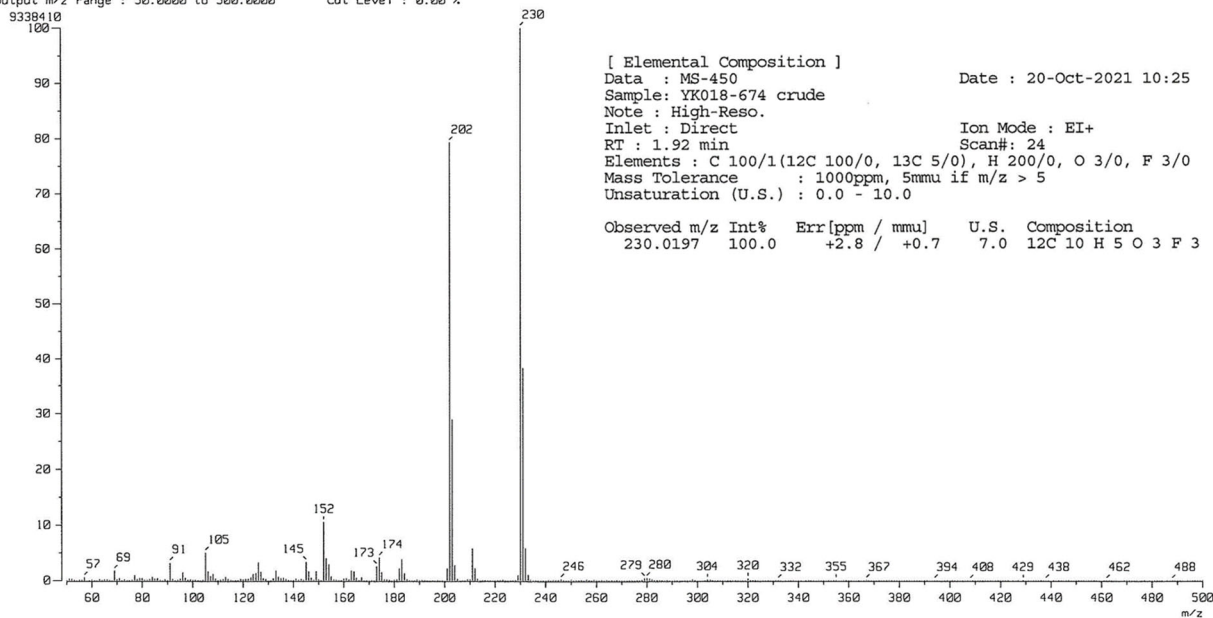

# 7-hydroxy-3-perfluorobutyl-2H-chromen-2-one (5b)

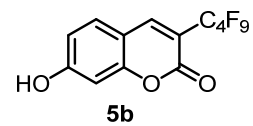

## <sup>1</sup>H NMR

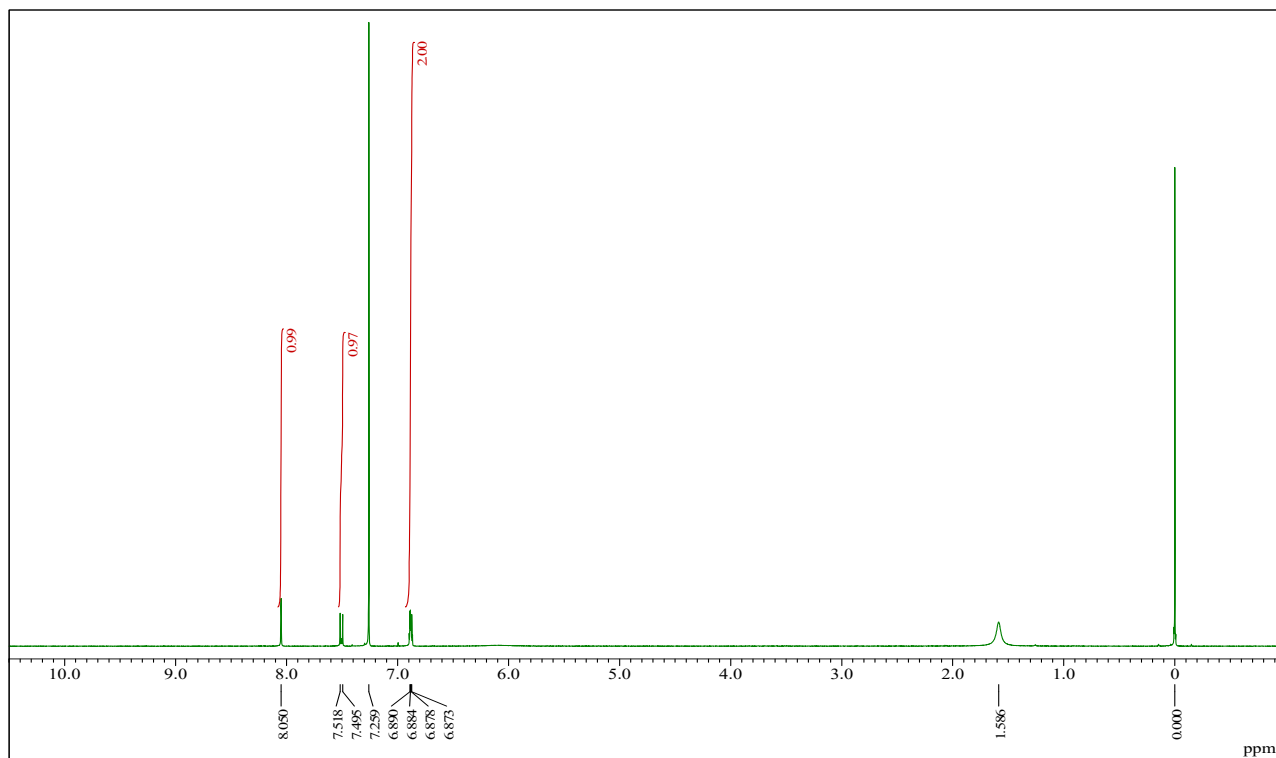

## <sup>13</sup>C NMR

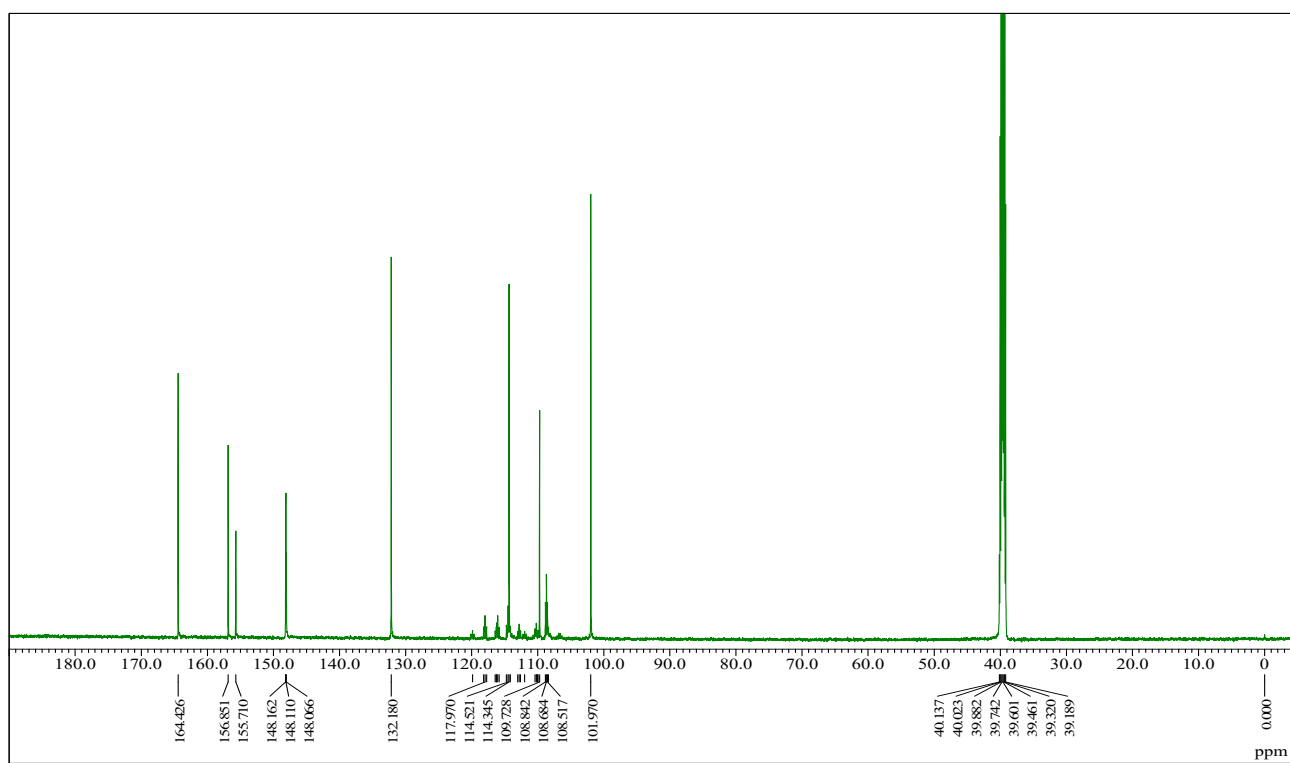

# <sup>19</sup>F NMR

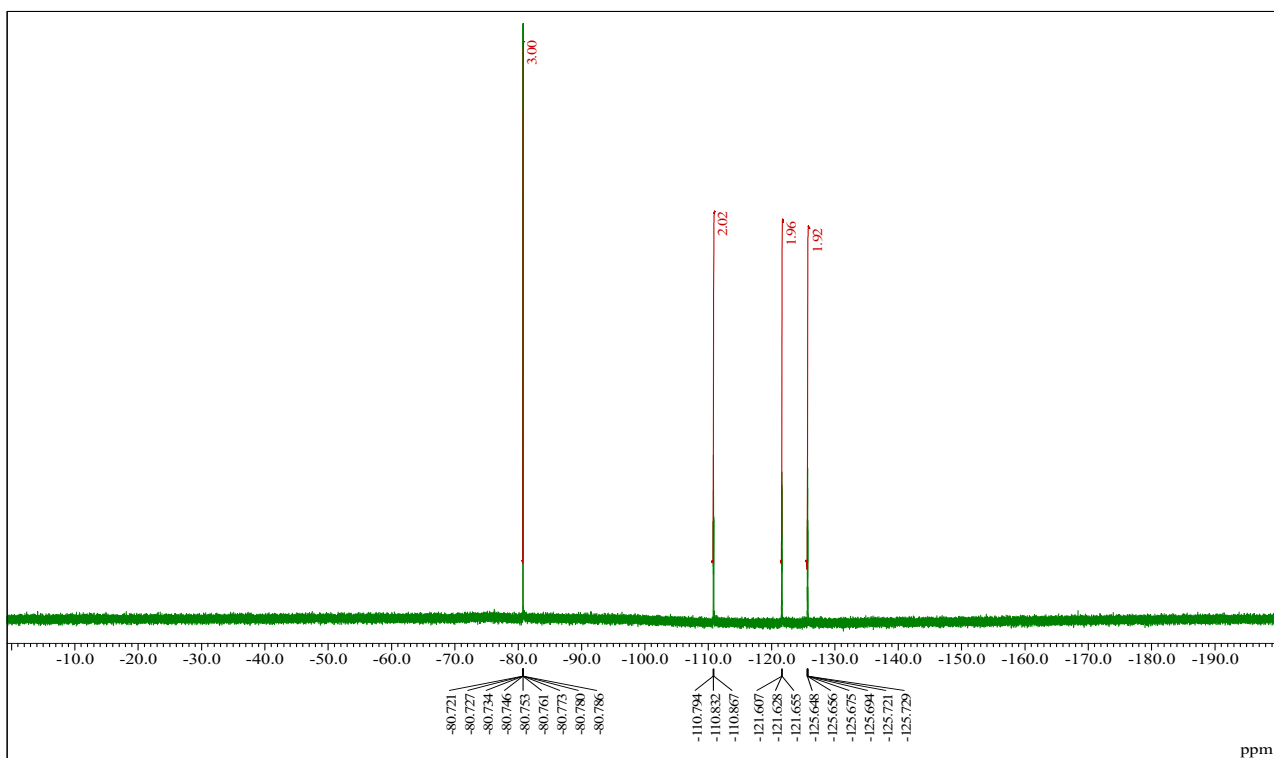

# IR

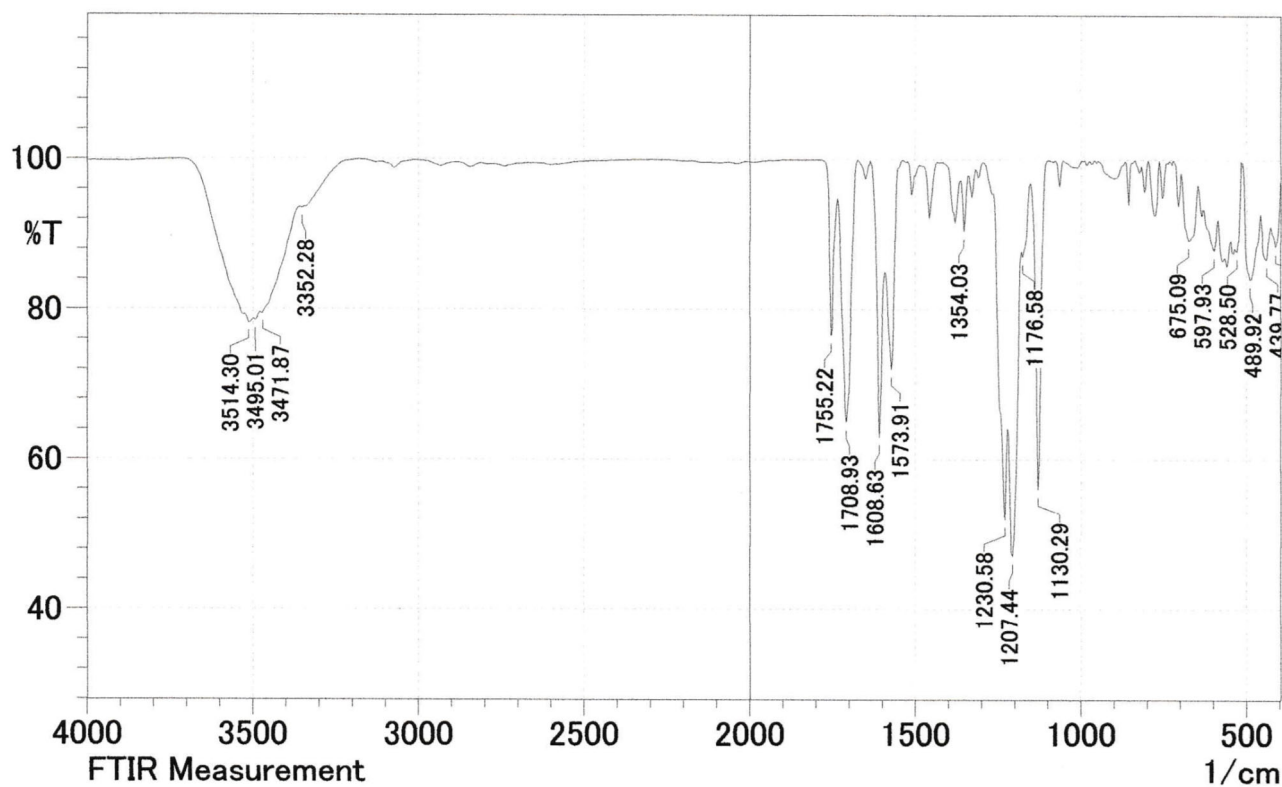

# HRMS

[ Mass Spectrum ]  
Data : MS-028 Date : 09-May-2021 19:31  
Sample: YK018-570 crude  
Note : 30eV 300uA 180deg.  
Inlet : Direct Ion Mode : EI+  
Spectrum Type : Normal Ion [MF-Linear]  
RT : 2.63 min Scan# : (20,24)  
BP : m/z 211.0202 Int. : 1012.38  
Output m/z range : 50.0200 to 500.0200 Cut Level : 0.00 %

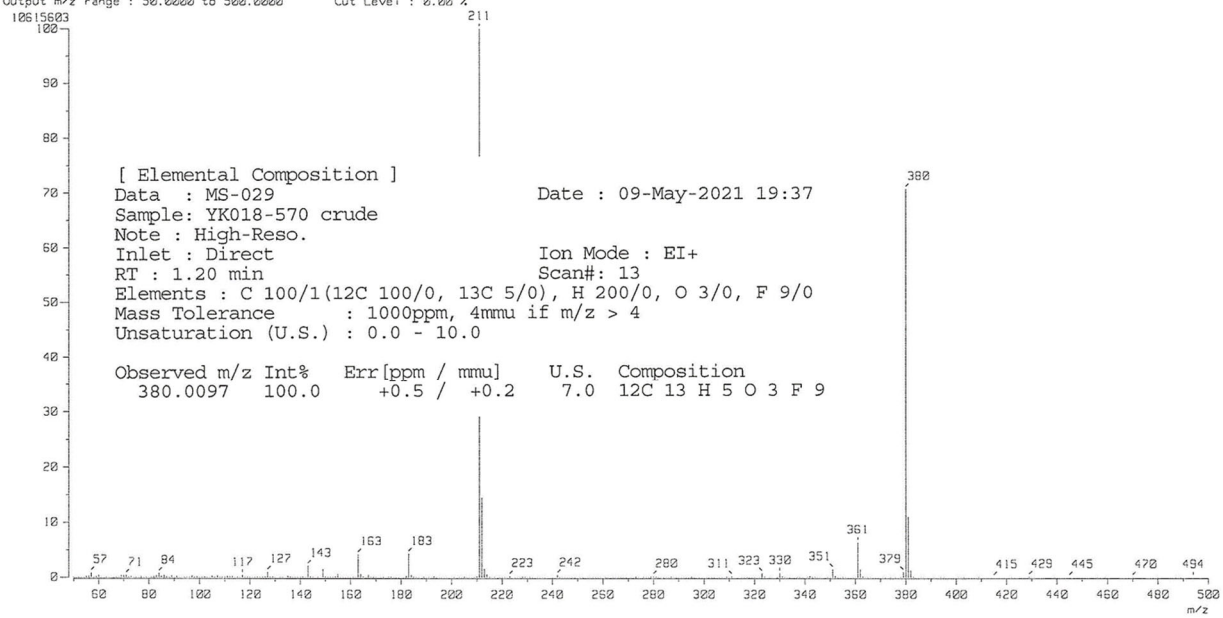

## Fluorescence decay curves

7-hydroxy-2*H*-chromen-2-one (1)

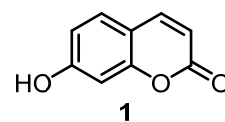

MeOH solution ( $5 \times 10^{-5}$  M)

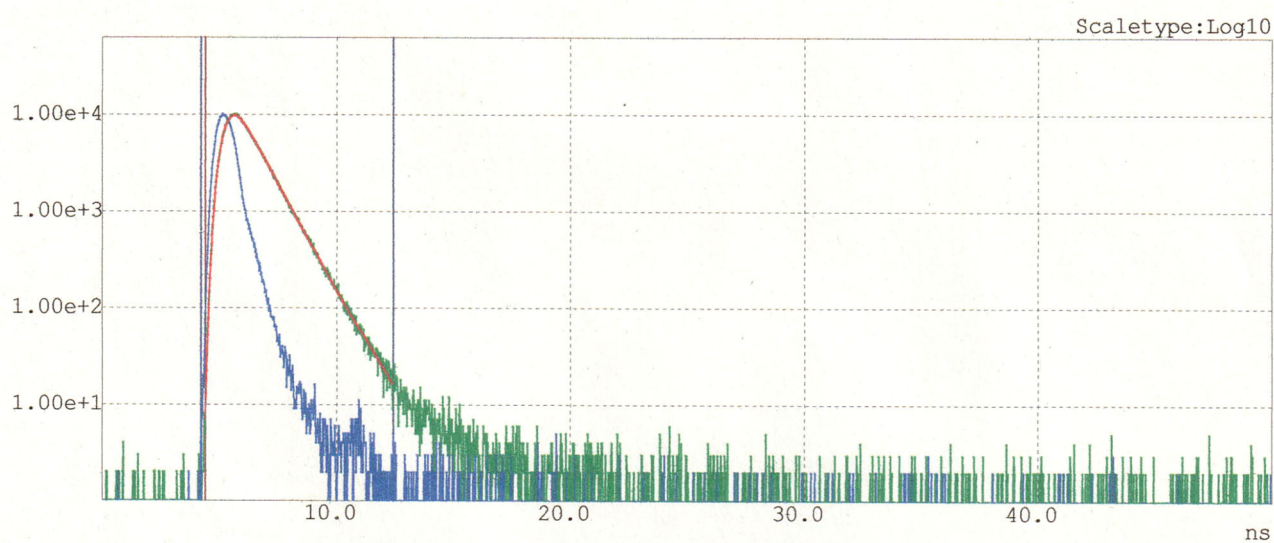



**7-benzyloxy-2H-chromen-2-one (2)**

**MeOH solution ( $5 \times 10^{-5}$  M)**

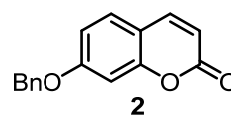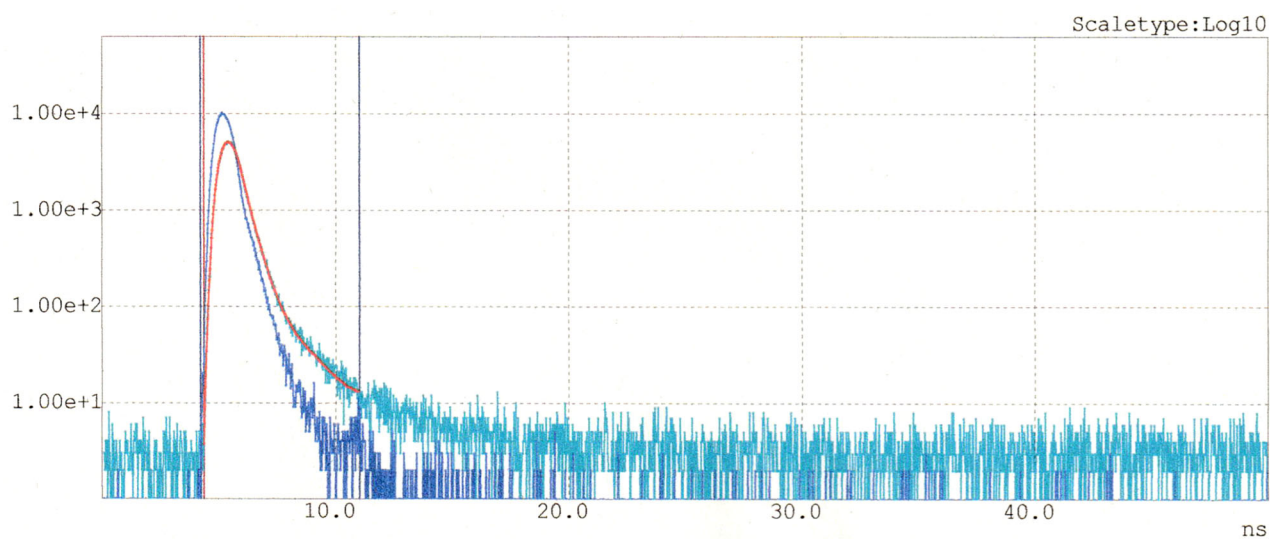

**Crystalline state**

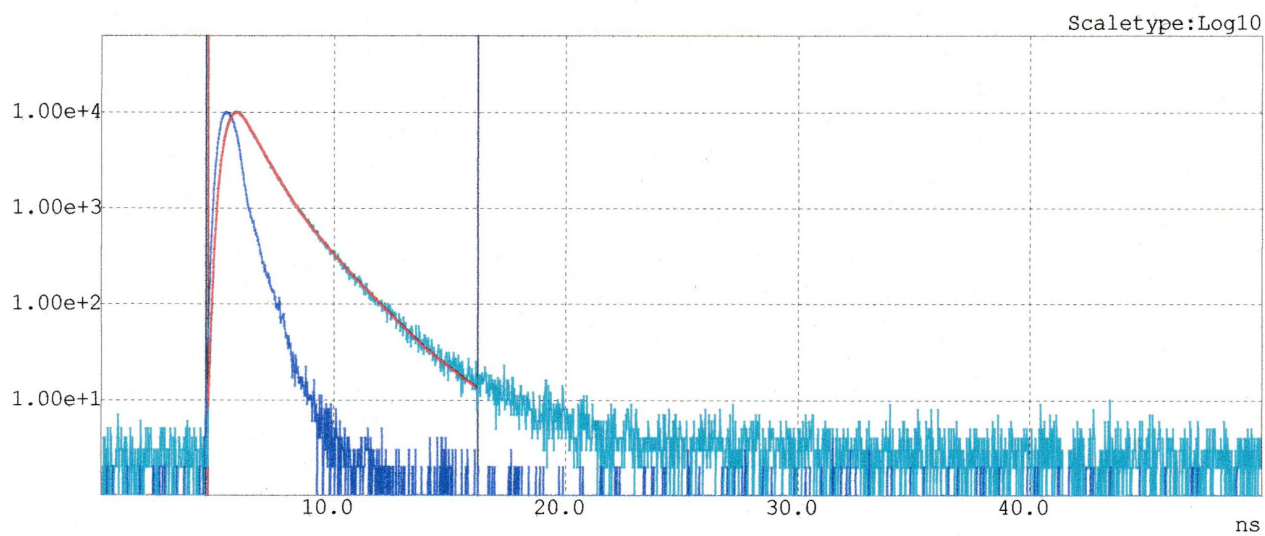

### 7-benzyloxy-3-trifluoromethyl-2H-chromen-2-one (4a)

MeOH solution ( $5 \times 10^{-5}$  M)

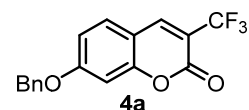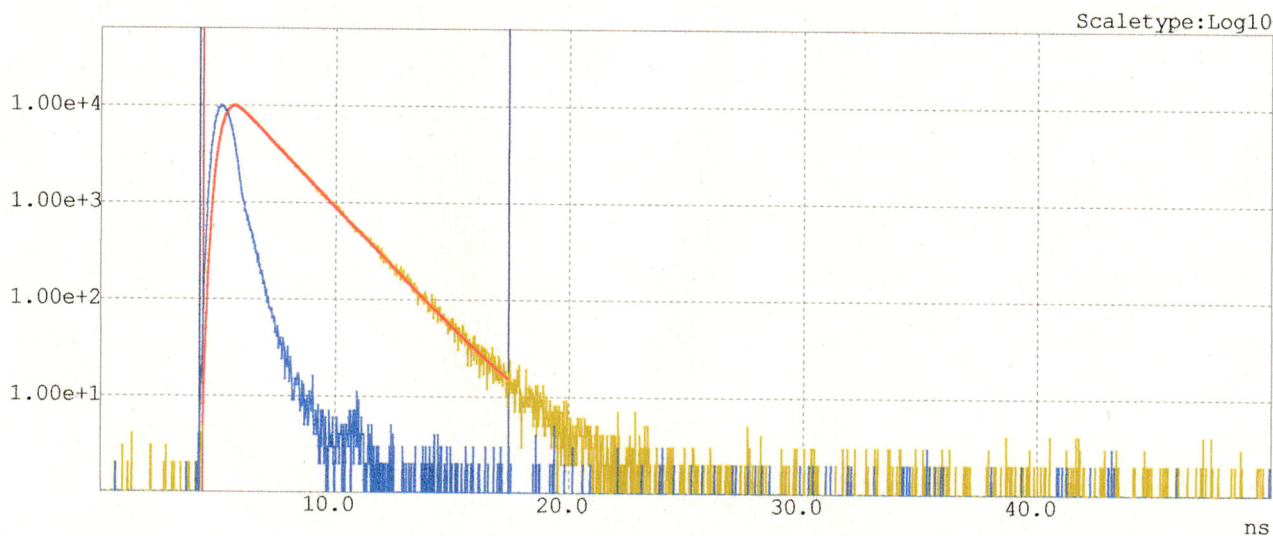

### Crystalline state

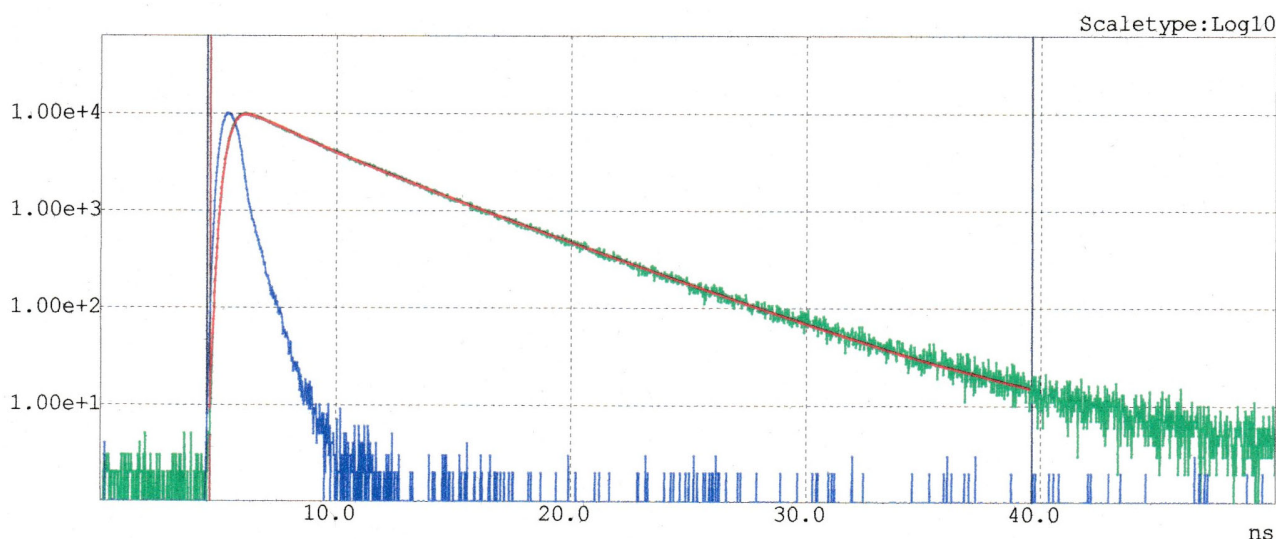

| Name | EMBL | CHI     | Max. Time | $\langle \tau \rangle$ | Tau1    | Tau2    | A1      | A2      | Background |
|------|------|---------|-----------|------------------------|---------|---------|---------|---------|------------|
| 4 4a | 414  | 1.14316 | 53.9      | 4.43105                | 2.13194 | 5.01829 | 128.091 | 213.049 | 4          |

For two-component systems,  $A_1$  and  $A_2$  are constants representing the mixing ratio of each component.

$\tau$  is expressed by the following formula

$$\langle \tau \rangle = (\text{Tau1} \times A_1) + (\text{Tau2} \times A_2)$$

In **4a**, Tau1 is the monomer fluorescence and Tau2 is the dimer fluorescence.

Therefore, the ratio of each component can be calculated as follows.

$$\text{Ratio of monomers present} = \frac{A_1}{A_1 + A_2} = \frac{128.091}{128.091 + 213.049} = 38 \%$$

$$\text{Ratio of dimer present} = \frac{A_2}{A_1 + A_2} = \frac{213.049}{128.091 + 213.049} = 62 \%$$

**Reference:** S. Fukushima, T. Yasui, T. Iwata, T. Araki, *Trans. Jpn. Soc. Med. Biol. Eng.*, **2006**, *44*, 702-706 (<https://doi.org/10.11239/jsmbe.44.702>).

**7-benzyloxy-3-perfluorobutyl-2H-chromen-2-one (4b)**

**MeOH solution ( $5 \times 10^{-5}$  M)**

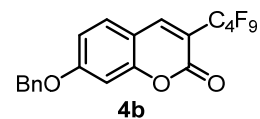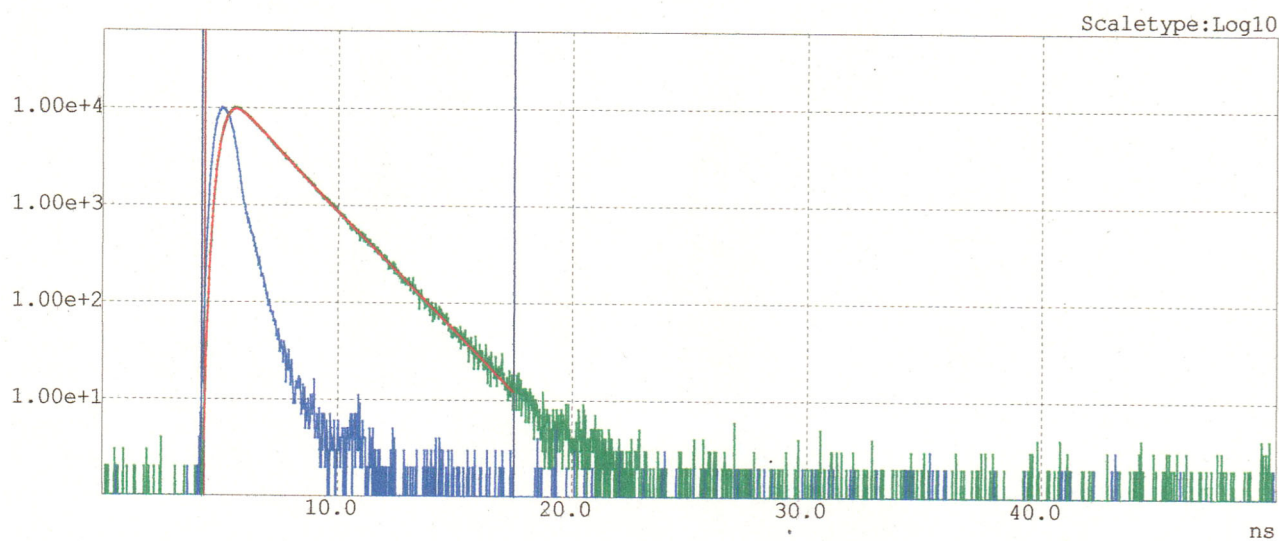

**Crystalline state**

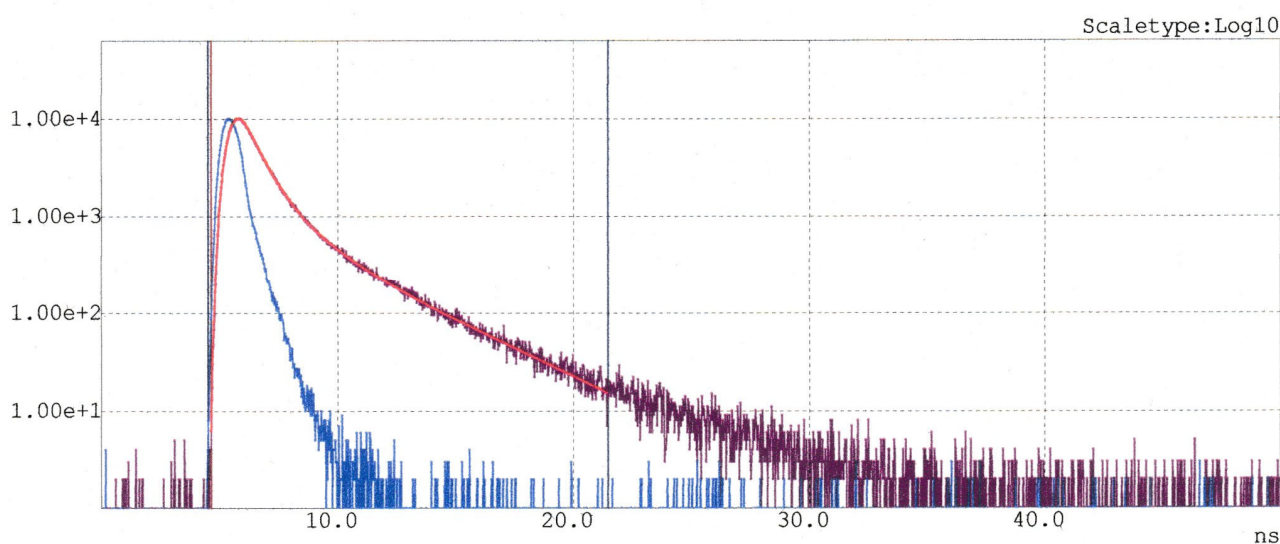

**7-hydroxy-3-trifluoromethyl-2H-chromen-2-one (5a)**

**MeOH solution ( $5 \times 10^{-5}$  M)**

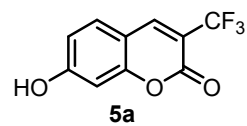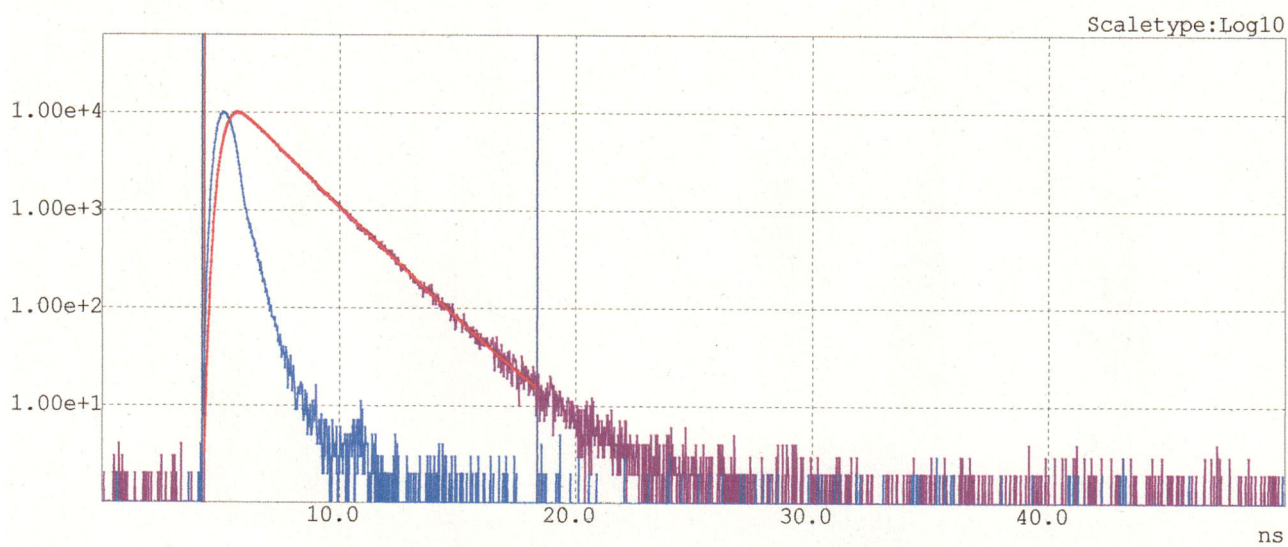

**7-hydroxy-3-perfluorobutyl-2H-chromen-2-one (5b)**

**MeOH solution ( $5 \times 10^{-5}$  M)**

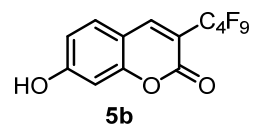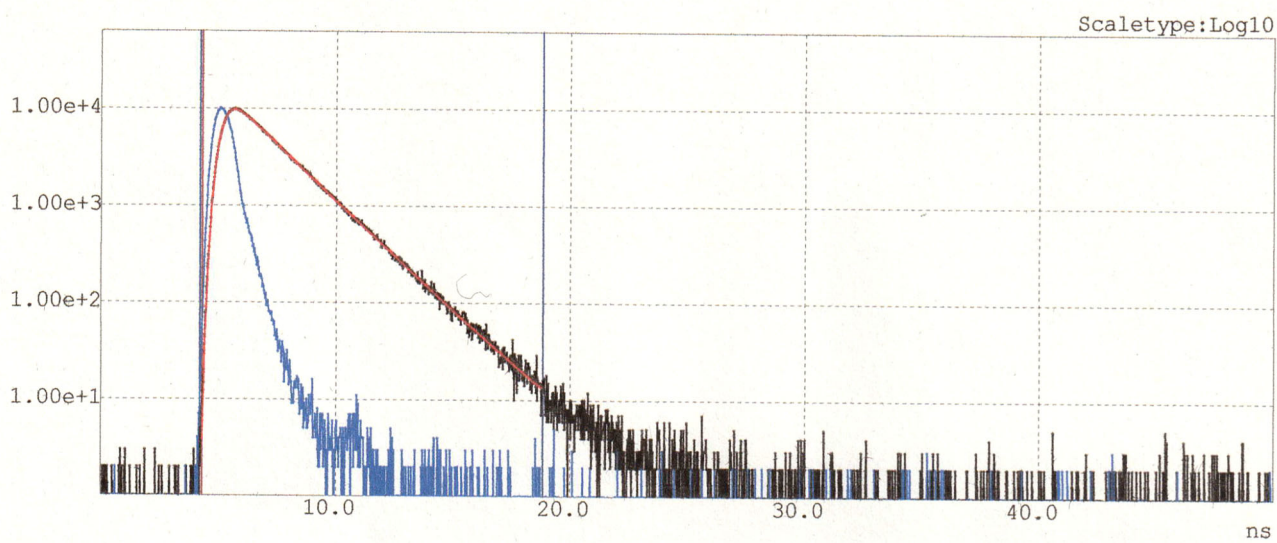

**Crystalline state**

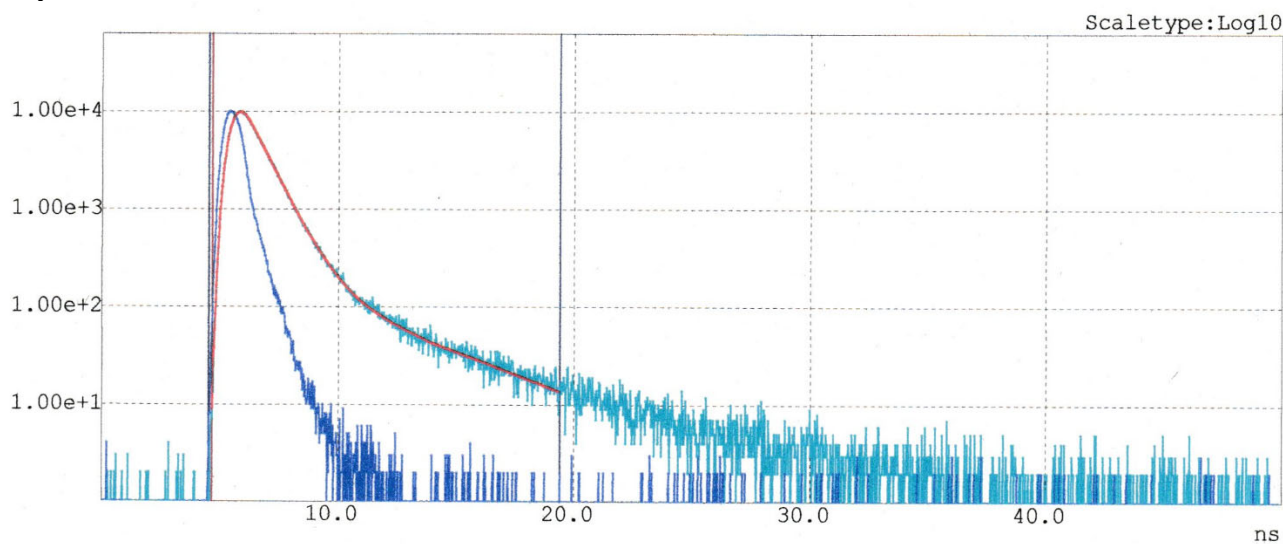

**Acetone solution ( $5 \times 10^{-5}$  M)**

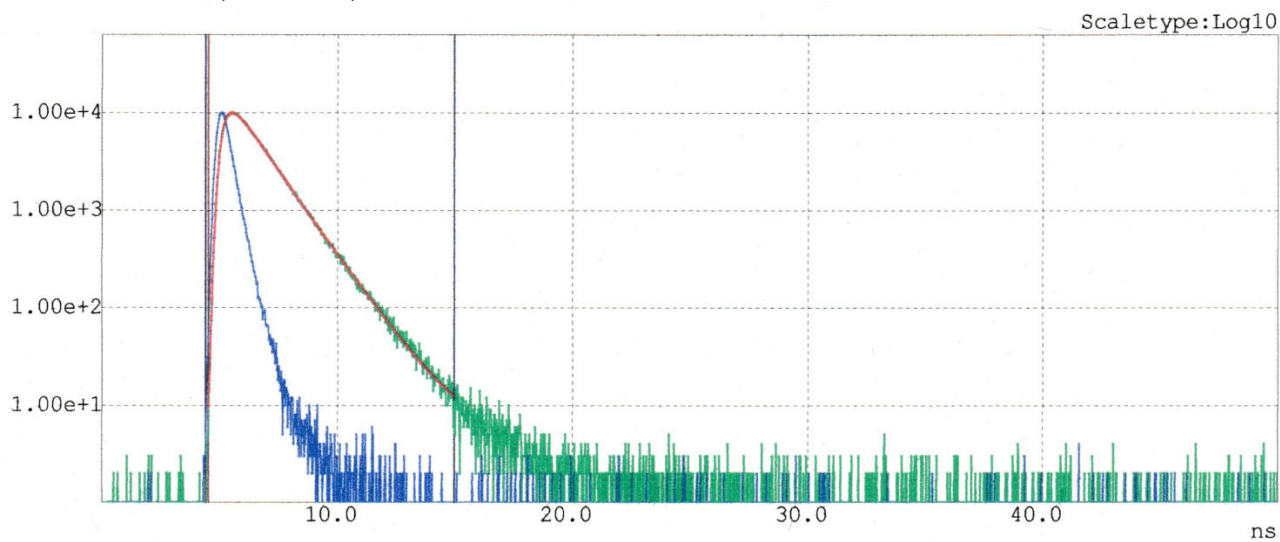

**Chloroform solution ( $5 \times 10^{-5}$  M)**

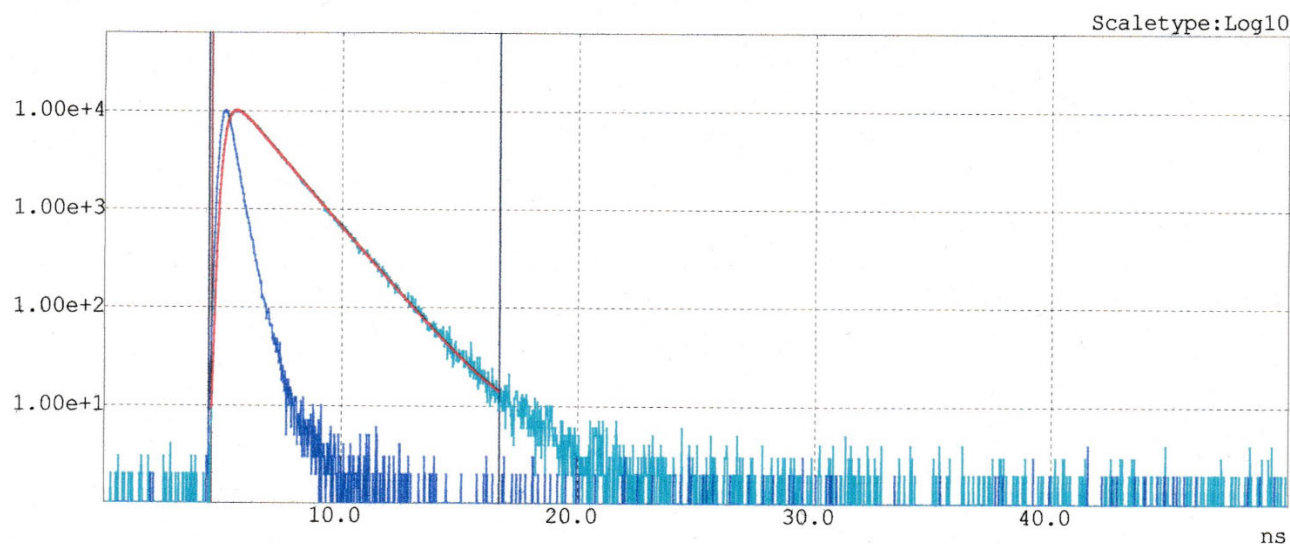

**THF (tetrahydrofuran) solution ( $5 \times 10^{-5}$  M)**

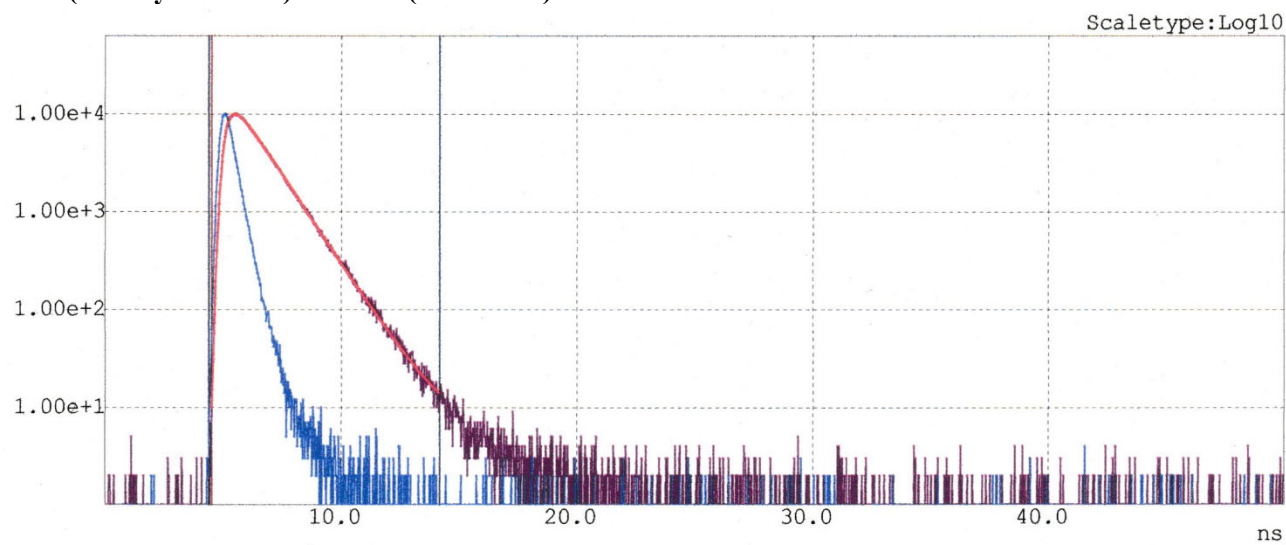

**Toluene solution ( $5 \times 10^{-5}$  M)**

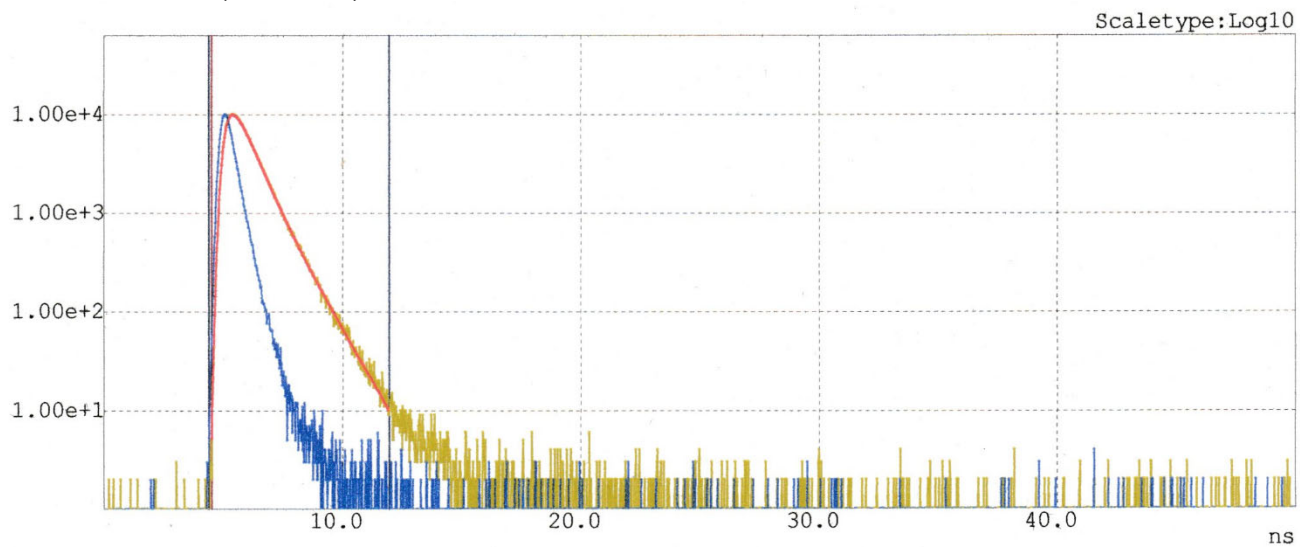

**MeOH solution ( $3 \times 10^{-5}$  M)**

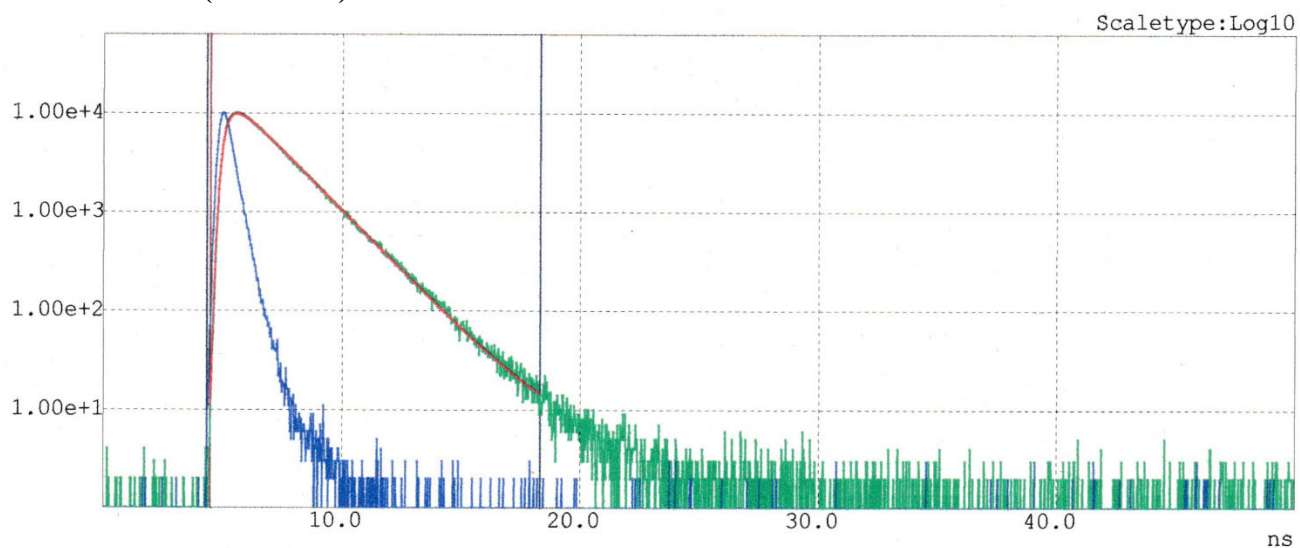

**MeOH solution with Et<sub>3</sub>N 0.1 equiv. ( $3 \times 10^{-5}$  M)**

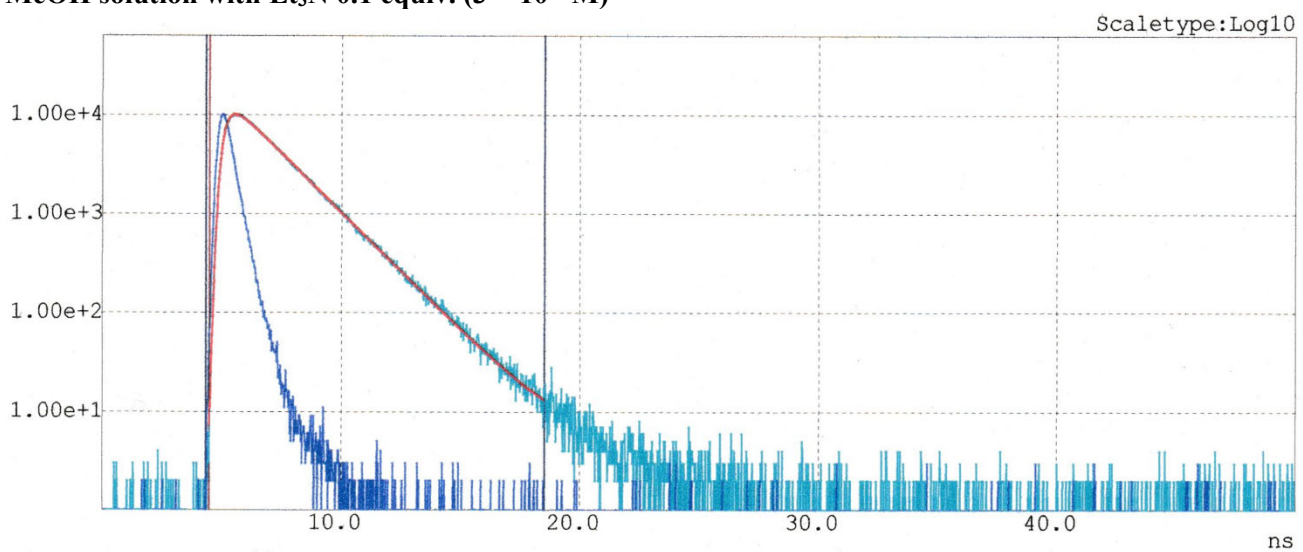

**MeOH solution with Et<sub>3</sub>N 0.5 equiv. ( $3 \times 10^{-5}$  M)**

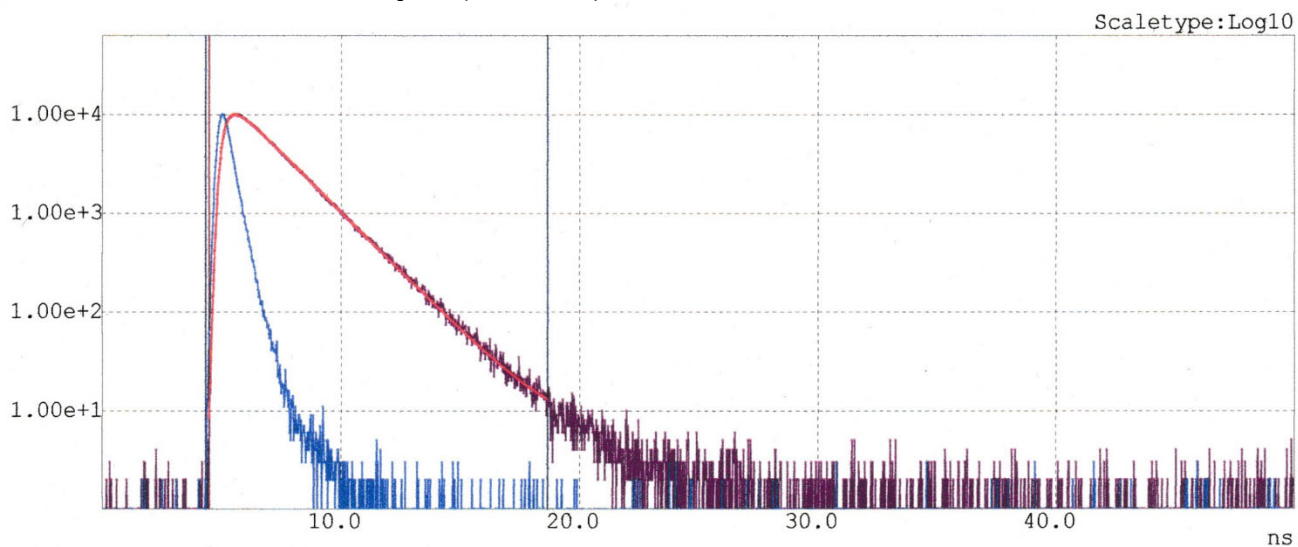

**MeOH solution with Et<sub>3</sub>N 1.0 equiv. ( $3 \times 10^{-5}$  M)**

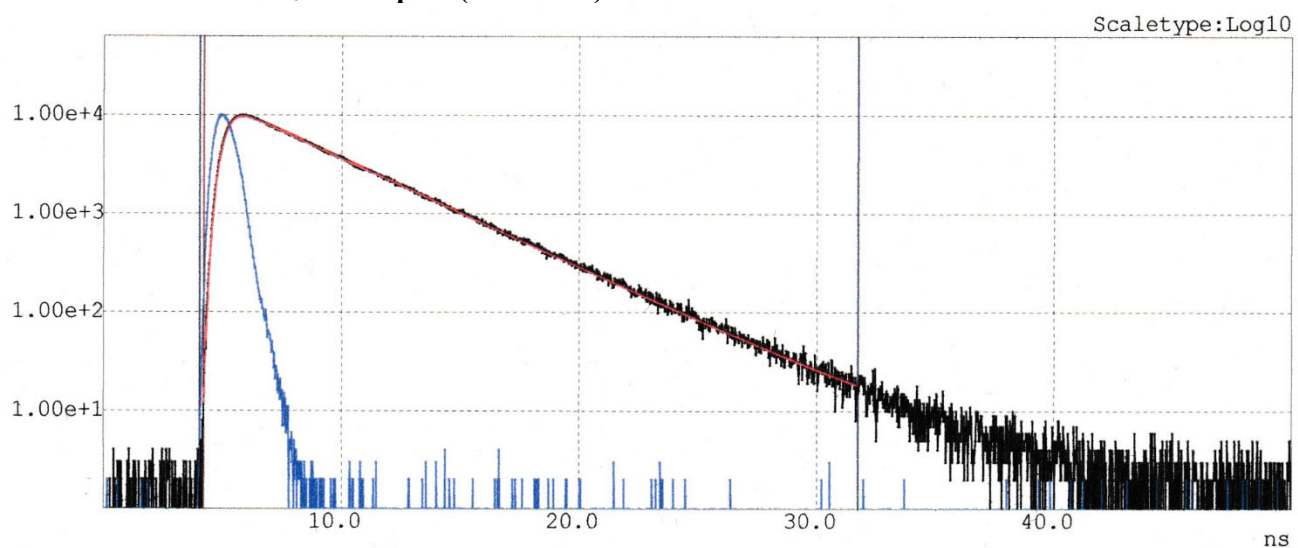

**MeOH solution with Et<sub>3</sub>N 5.0 equiv. ( $3 \times 10^{-5}$  M)**

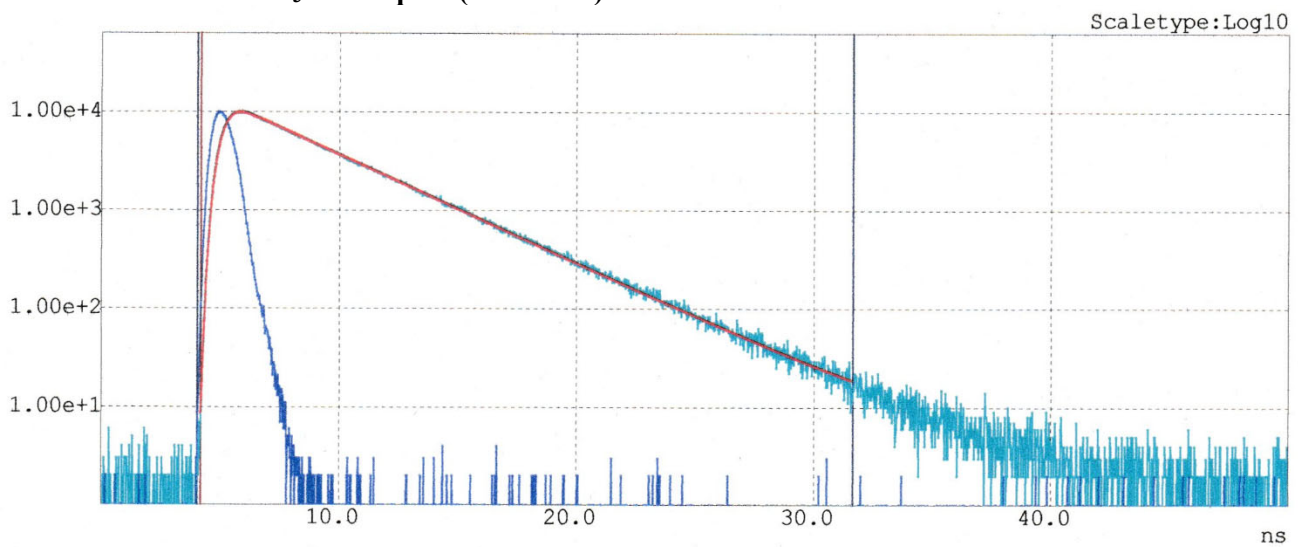



MeOH solution with Et<sub>3</sub>N 10 equiv. ( $3 \times 10^{-5}$  M)

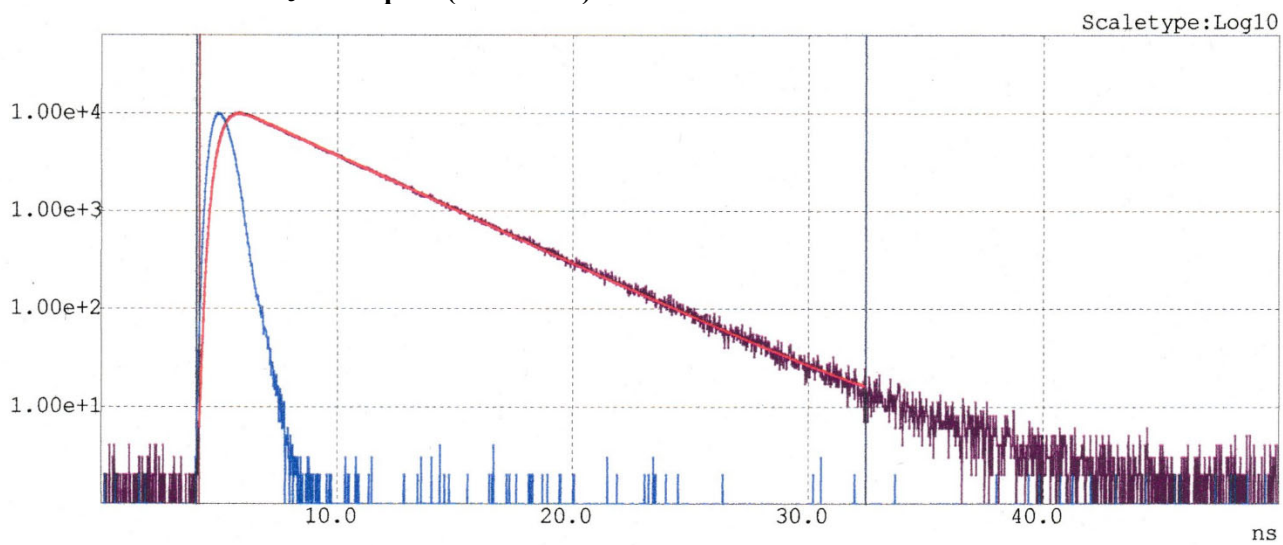

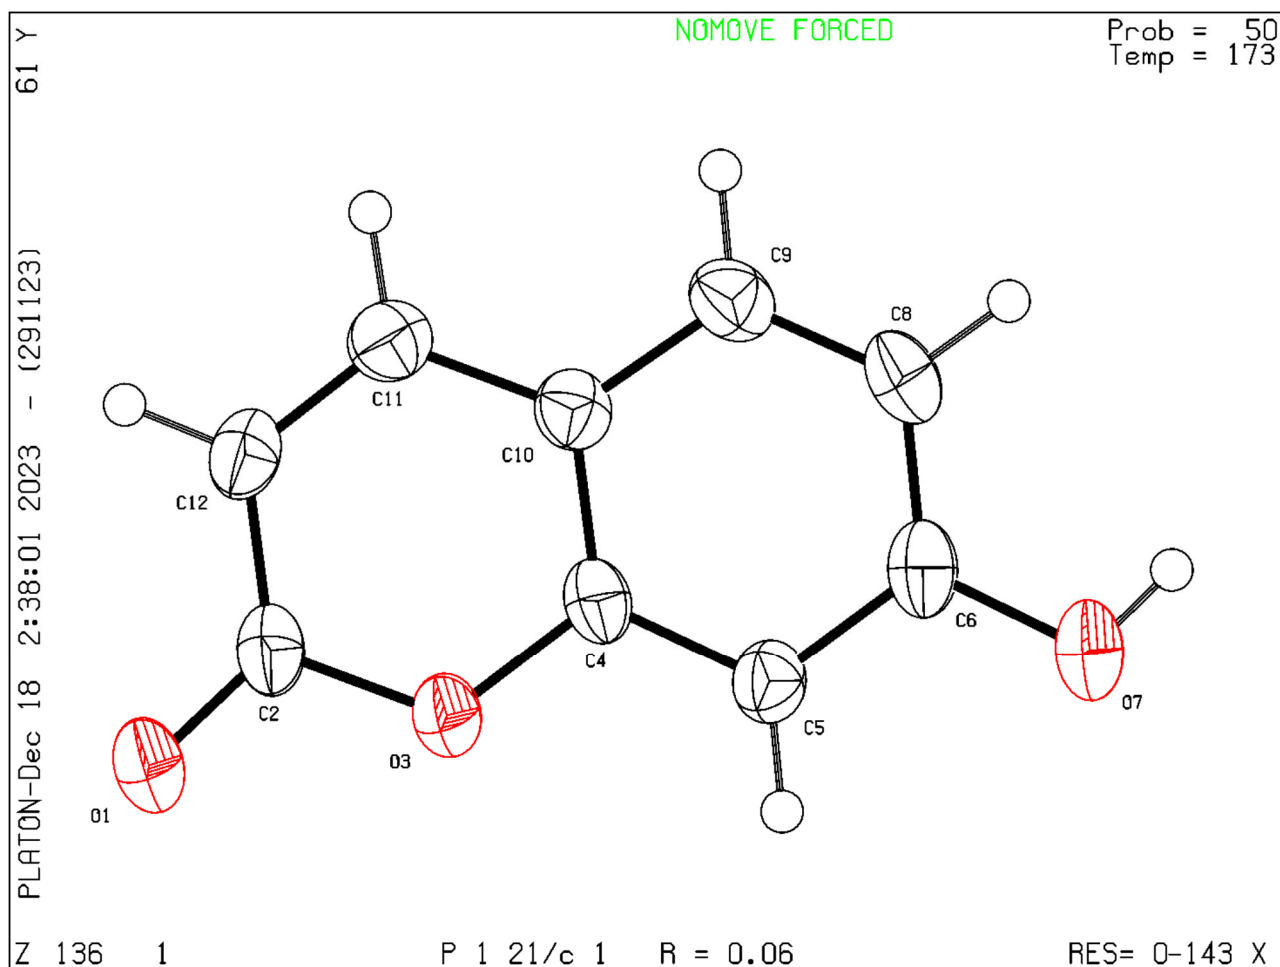

**Figure S1.** ORTEP diagram of **1**.

A crystal of the **1** was precipitated by using the vapor-diffusion method with hexane and acetone in freezer.

The X-ray Crystal Structure was collected on Rigaku Oxford Diffraction.

The thermal ellipsoids are drawn at the 50 % probability level.

**Table S1.** Crystal data and structure refinement for **1**.

|                      |                                              |                 |
|----------------------|----------------------------------------------|-----------------|
| Identification code  | <b>1</b>                                     |                 |
| Empirical formula    | C <sub>9</sub> H <sub>6</sub> O <sub>3</sub> |                 |
| Formula weight       | 162.14                                       |                 |
| Temperature          | 173(2) K                                     |                 |
| Wavelength           | 0.71073 Å                                    |                 |
| Crystal system       | monoclinic                                   |                 |
| Space group          | P2 <sub>1</sub> /c                           |                 |
| Unit cell dimensions | a = 3.8515(4) Å                              | α = 90°.        |
|                      | b = 11.0399(13) Å                            | β = 90.489(8)°. |
|                      | c = 16.7731(13) Å                            | γ = 90°.        |
| Volume               | 713.17(12) Å <sup>3</sup>                    |                 |
| Z                    | 4                                            |                 |

|                                   |                                                   |
|-----------------------------------|---------------------------------------------------|
| Density (calculated)              | 1.510 Mg/m <sup>3</sup>                           |
| Absorption coefficient            | 0.115 mm <sup>-1</sup>                            |
| F(000)                            | 336                                               |
| Crystal size                      | 0.213 x 0.113 x 0.105 mm <sup>3</sup>             |
| Theta range for data collection   | 2.209 to 26.370°.                                 |
| Index ranges                      | -4<=h<=4, -13<=k<=13, -20<=l<=20                  |
| Reflections collected             | 6911                                              |
| Independent reflections           | 1453 [R(int) = 0.0595]                            |
| Completeness to theta = 25.242°   | 99.8%                                             |
| Refinement method                 | Full-matrix least-squares on F <sup>2</sup>       |
| Data/restraints/parameters        | 1453 / 0 / 110                                    |
| Goodness-of-fit on F <sup>2</sup> | 1.026                                             |
| Final R indexes [I>=2sigma(I)]    | R <sub>1</sub> = 0.0570, wR <sub>2</sub> = 0.1544 |
| Final R indexes (all data)        | R <sub>1</sub> = 0.0751, wR <sub>2</sub> = 0.1696 |
| Extinction coefficient            | n/a                                               |
| Largest diff. peak and hole       | 0.331 and -0.249 e.Å <sup>-3</sup>                |

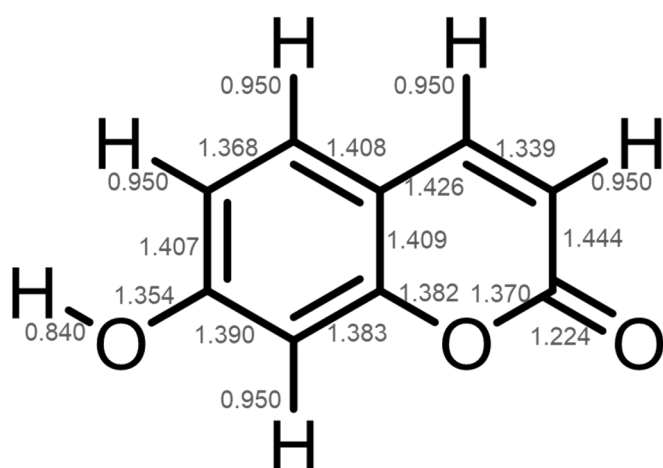

**Figure S2.** Bond Length of 1.

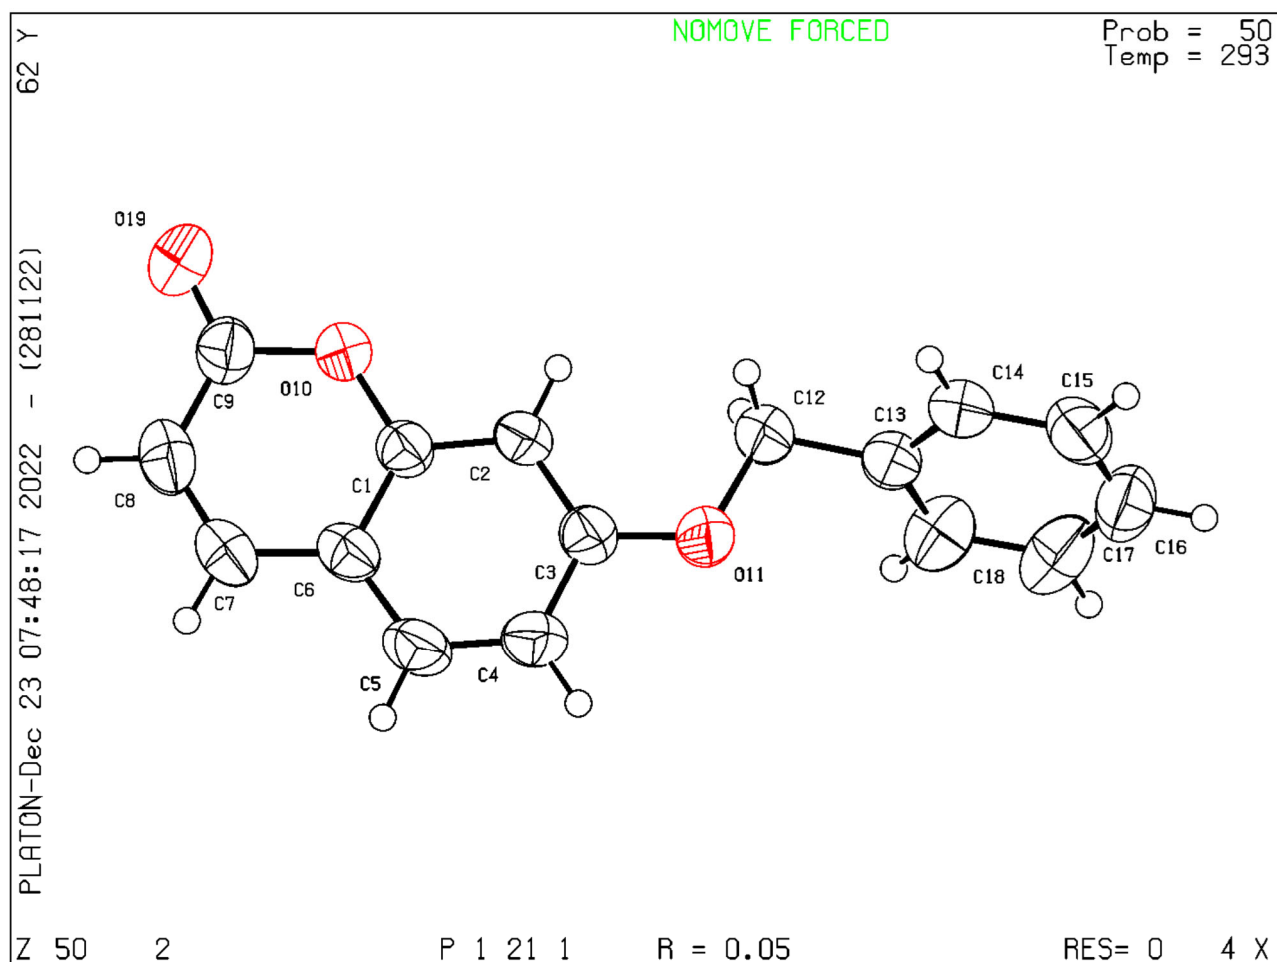

**Figure S3.** ORTEP diagram of **2**.

A crystal of the **2** was precipitated by using the solvent evaporation method with hexane and chloroform in freezer.

The X-ray Crystal Structure was collected on Rigaku Oxford Diffraction. The thermal ellipsoids are drawn at the 50 % probability level.

**Table S2.** Crystal data and structure refinement for **2**.

|                      |                                                |                 |
|----------------------|------------------------------------------------|-----------------|
| Identification code  | <b>2</b>                                       |                 |
| Empirical formula    | C <sub>16</sub> H <sub>12</sub> O <sub>3</sub> |                 |
| Formula weight       | 252.26                                         |                 |
| Temperature          | 293(2) K                                       |                 |
| Wavelength           | 1.54184 Å                                      |                 |
| Crystal system       | monoclinic                                     |                 |
| Space group          | P2 <sub>1</sub>                                |                 |
| Unit cell dimensions | a = 4.4183(2) Å                                | α = 90°.        |
|                      | b = 10.1778(4) Å                               | β = 92.256(4)°. |
|                      | c = 13.9165(5) Å                               | γ = 90°.        |
| Volume               | 625.32(4) Å <sup>3</sup>                       |                 |
| Z                    | 2                                              |                 |

|                                   |                                                   |
|-----------------------------------|---------------------------------------------------|
| Density (calculated)              | 1.340 Mg/m <sup>3</sup>                           |
| Absorption coefficient            | 0.754 mm <sup>-1</sup>                            |
| F(000)                            | 264                                               |
| Crystal size                      | 0.400 x 0.150 x 0.050 mm <sup>3</sup>             |
| Theta range for data collection   | 3.178 to 69.751°.                                 |
| Index ranges                      | -5<=h<=5, -12<=k<=12, -11<=l<=16                  |
| Reflections collected             | 3182                                              |
| Independent reflections           | 1957 [R(int) = 0.0311]                            |
| Completeness to theta = 25.242°   | 99.9%                                             |
| Refinement method                 | Full-matrix least-squares on F <sup>2</sup>       |
| Data/restraints/parameters        | 1957 / 1 / 173                                    |
| Goodness-of-fit on F <sup>2</sup> | 1.047                                             |
| Final R indexes [I>=2sigma(I)]    | R <sub>1</sub> = 0.0546, wR <sub>2</sub> = 0.1562 |
| Final R indexes (all data)        | R <sub>1</sub> = 0.0567, wR <sub>2</sub> = 0.1599 |
| Extinction coefficient            | 0.026(5)                                          |
| Largest diff. peak and hole       | 0.211 and -0.184 e.Å <sup>-3</sup>                |

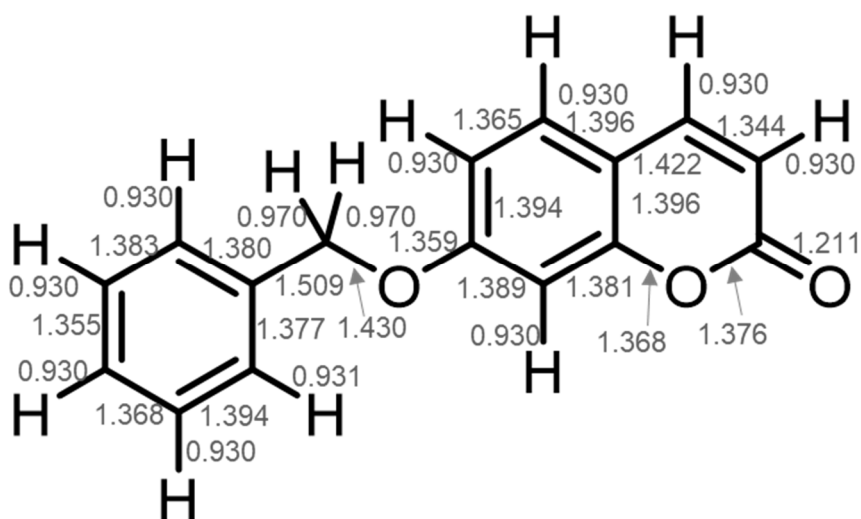

Figure S4. Bond Length of 2.

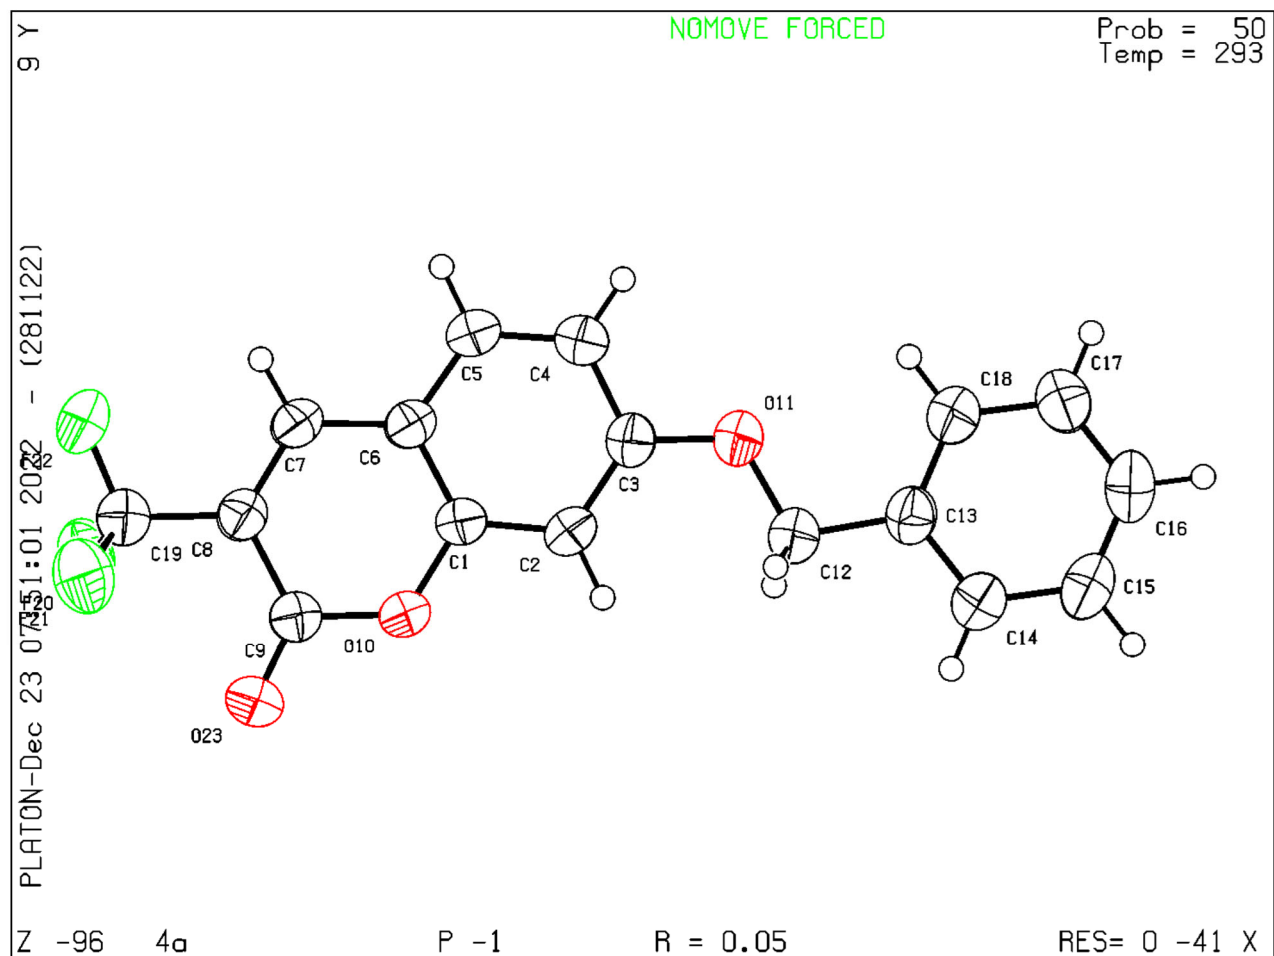

**Figure S5.** ORTEP diagram of **4a**.

A crystal of the **4a** was precipitated by using the vapor-diffusion method with hexane and chloroform in freezer.

The X-ray Crystal Structure was collected on Rigaku Oxford Diffraction.

The thermal ellipsoids are drawn at the 50 % probability level.

**Table S3.** Crystal data and structure refinement for **4a**.

|                      |                                                               |                  |
|----------------------|---------------------------------------------------------------|------------------|
| Identification code  | <b>4a</b>                                                     |                  |
| Empirical formula    | C <sub>17</sub> H <sub>11</sub> F <sub>3</sub> O <sub>3</sub> |                  |
| Formula weight       | 320.26                                                        |                  |
| Temperature          | 293(2) K                                                      |                  |
| Wavelength           | 1.54184 Å                                                     |                  |
| Crystal system       | triclinic                                                     |                  |
| Space group          | P-1                                                           |                  |
| Unit cell dimensions | a = 6.6324(3) Å                                               | α = 97.289(4)°.  |
|                      | b = 10.1334(5) Å                                              | β = 91.792(4)°.  |
|                      | c = 10.8812(5) Å                                              | γ = 104.569(4)°. |
| Volume               | 700.56(5) Å <sup>3</sup>                                      |                  |
| Z                    | 2                                                             |                  |
| Density (calculated) | 1.518 Mg/m <sup>3</sup>                                       |                  |

|                                   |                                                   |
|-----------------------------------|---------------------------------------------------|
| Absorption coefficient            | 1.125 mm <sup>-1</sup>                            |
| F(000)                            | 328                                               |
| Crystal size                      | 0.300 x 0.080 x 0.040 mm <sup>3</sup>             |
| Theta range for data collection   | 4.105 to 69.676°.                                 |
| Index ranges                      | -7<=h<=7, -12<=k<=12, -13<=l<=9                   |
| Reflections collected             | 6299                                              |
| Independent reflections           | 2603 [R(int) = 0.0366]                            |
| Completeness to theta = 25.242°   | 99.9%                                             |
| Refinement method                 | Full-matrix least-squares on F <sup>2</sup>       |
| Data/restraints/parameters        | 2603 / 0 / 209                                    |
| Goodness-of-fit on F <sup>2</sup> | 1.077                                             |
| Final R indexes [I>=2sigma(I)]    | R <sub>1</sub> = 0.0453, wR <sub>2</sub> = 0.1338 |
| Final R indexes (all data)        | R <sub>1</sub> = 0.0513, wR <sub>2</sub> = 0.1405 |
| Extinction coefficient            | 0.0077(14)                                        |
| Largest diff. peak and hole       | 0.251 and -0.176 e.Å <sup>-3</sup>                |

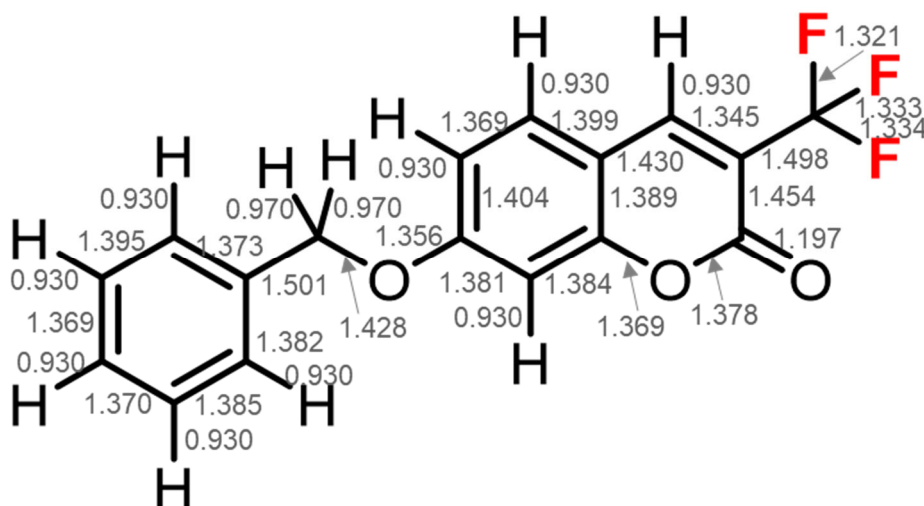

Figure S6. Bond Length of 4a.

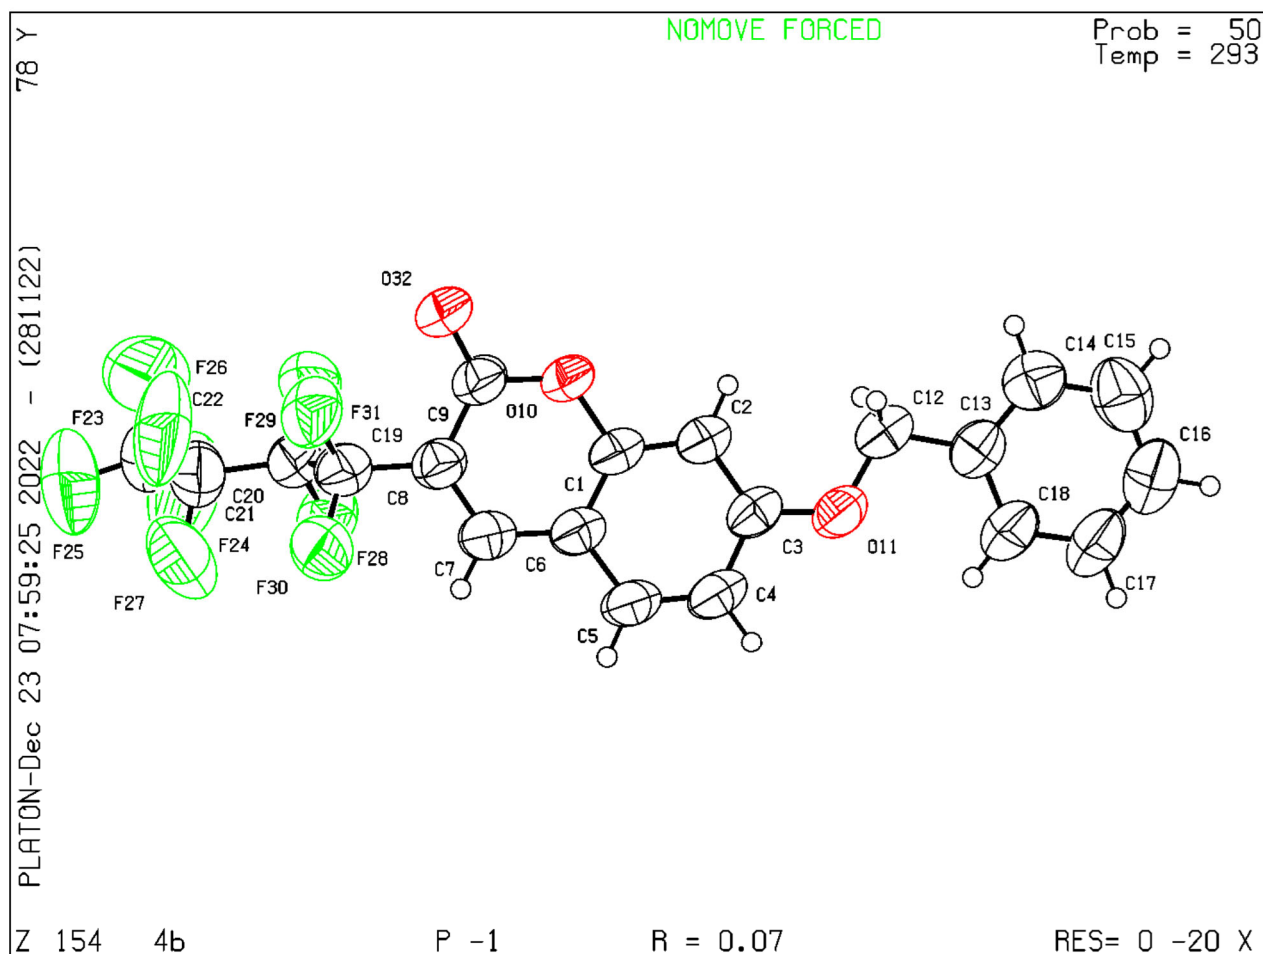

**Figure S7.** ORTEP diagram of **4b**.

A crystal of the **4b** was precipitated by using the vapor-diffusion method with hexane and chloroform in freezer.

The X-ray Crystal Structure was collected on Rigaku Oxford Diffraction.  
The thermal ellipsoids are drawn at the 50 % probability level.

**Table S4.** Crystal data and structure refinement for **4b**.

|                      |                                                               |                 |
|----------------------|---------------------------------------------------------------|-----------------|
| Identification code  | <b>4b</b>                                                     |                 |
| Empirical formula    | C <sub>20</sub> H <sub>11</sub> F <sub>9</sub> O <sub>3</sub> |                 |
| Formula weight       | 470.29                                                        |                 |
| Temperature          | 293(2) K                                                      |                 |
| Wavelength           | 1.54184 Å                                                     |                 |
| Crystal system       | triclinic                                                     |                 |
| Space group          | P-1                                                           |                 |
| Unit cell dimensions | a = 7.4736(4) Å                                               | α = 85.931(4)°. |
|                      | b = 8.8428(4) Å                                               | β = 88.314(4)°. |
|                      | c = 15.7659(7) Å                                              | γ = 69.315(5)°. |
| Volume               | 972.29(8) Å <sup>3</sup>                                      |                 |
| Z                    | 2                                                             |                 |
| Density (calculated) | 1.606 Mg/m <sup>3</sup>                                       |                 |



|                                   |                                                   |
|-----------------------------------|---------------------------------------------------|
| Absorption coefficient            | 1.481 mm <sup>-1</sup>                            |
| F(000)                            | 472                                               |
| Crystal size                      | 0.400 x 0.200 x 0.050 mm <sup>3</sup>             |
| Theta range for data collection   | 2.810 to 69.918°.                                 |
| Index ranges                      | -9<=h<=9, -10<=k<=10, -19<=l<=19                  |
| Reflections collected             | 8997                                              |
| Independent reflections           | 3633 [R(int) = 0.0375]                            |
| Completeness to theta = 25.242°   | 100 %                                             |
| Refinement method                 | Full-matrix least-squares on F <sup>2</sup>       |
| Data/restraints/parameters        | 3633 / 0 / 290                                    |
| Goodness-of-fit on F <sup>2</sup> | 1.104                                             |
| Final R indexes [I>=2sigma(I)]    | R <sub>1</sub> = 0.0660, wR <sub>2</sub> = 0.2043 |
| Final R indexes (all data)        | R <sub>1</sub> = 0.0788, wR <sub>2</sub> = 0.2022 |
| Extinction coefficient            | 0.0077(14)                                        |
| Largest diff. peak and hole       | 0.266 and -0.300 e.Å <sup>-3</sup>                |

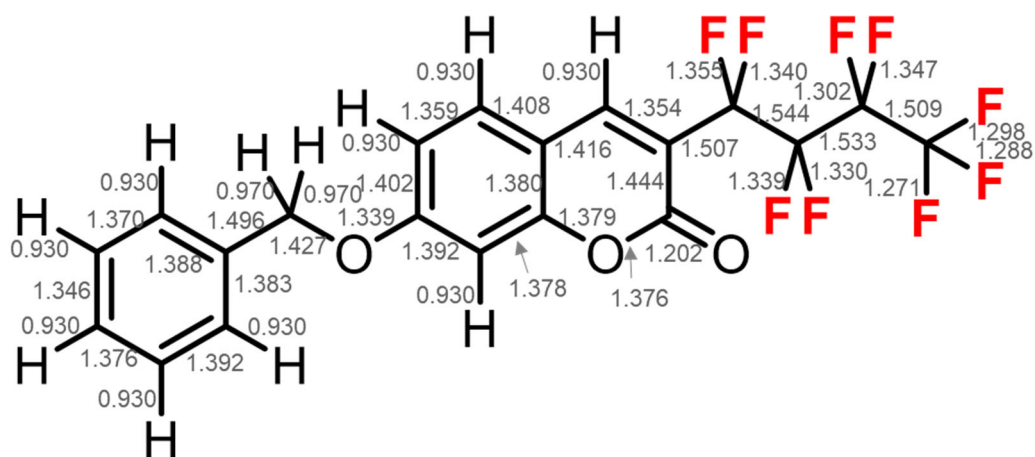

**Figure S8.** Bond Length of **4b**.

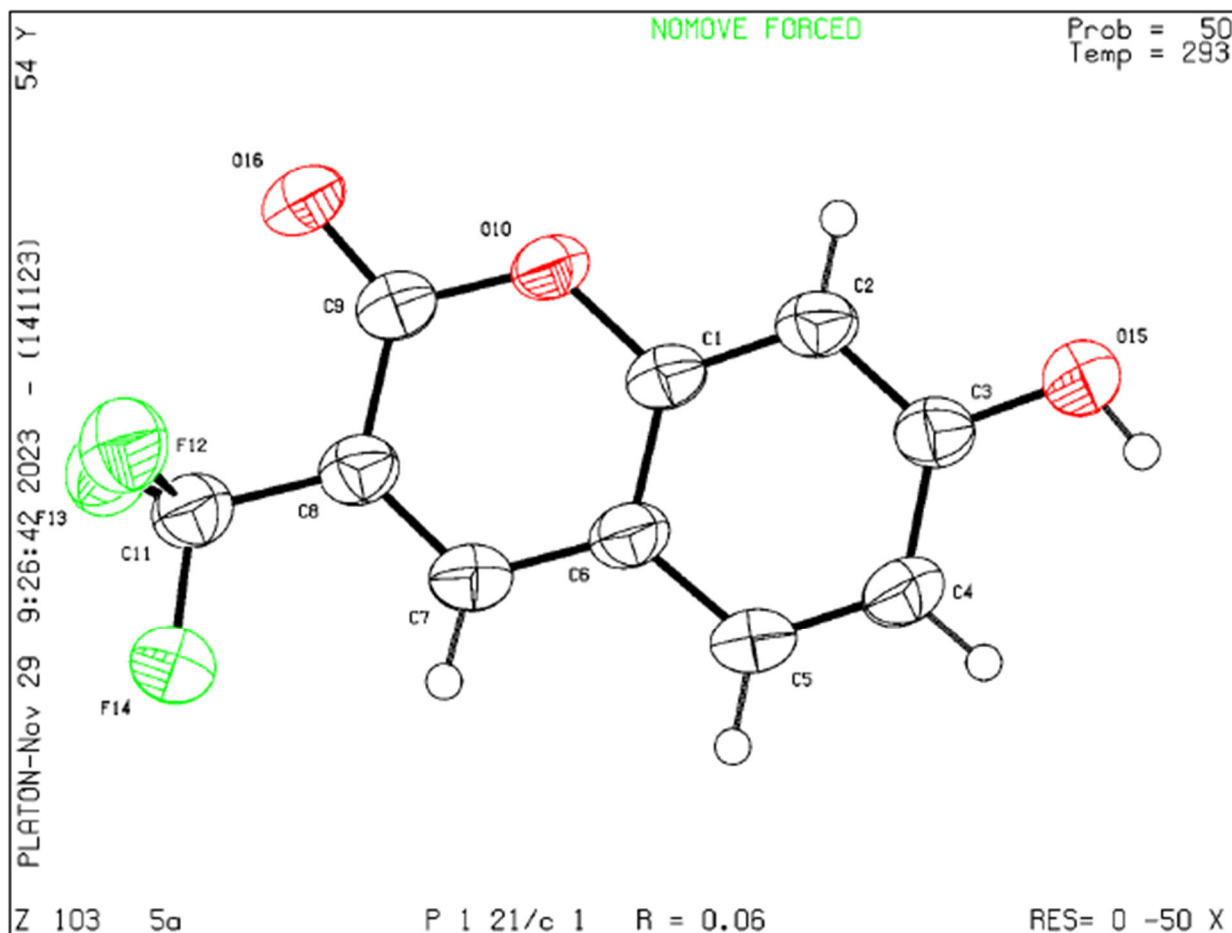

**Figure S9.** ORTEP diagram of **5a**.

A crystal of the **5a** was precipitated by using the vapor-diffusion method with hexane and chloroform in freezer.

The X-ray Crystal Structure was collected on Rigaku Oxford Diffraction.

The thermal ellipsoids are drawn at the 50 % probability level.

**Table S5.** Crystal data and structure refinement for **5a**.

|                      |                                                              |                  |
|----------------------|--------------------------------------------------------------|------------------|
| Identification code  | <b>5a</b>                                                    |                  |
| Empirical formula    | C <sub>10</sub> H <sub>5</sub> F <sub>3</sub> O <sub>3</sub> |                  |
| Formula weight       | 230.14                                                       |                  |
| Temperature          | 293(2) K                                                     |                  |
| Wavelength           | 1.54184 Å                                                    |                  |
| Crystal system       | monoclinic                                                   |                  |
| Space group          | P2 <sub>1</sub> /c                                           |                  |
| Unit cell dimensions | a = 8.6323(4) Å                                              | α = 90°.         |
|                      | b = 7.1785(3) Å                                              | β = 103.982(5)°. |
|                      | c = 14.9074(7) Å                                             | γ = 90°.         |
| Volume               | 896.40(7) Å <sup>3</sup>                                     |                  |
| Z                    | 4                                                            |                  |
| Density (calculated) | 1.705 Mg/m <sup>3</sup>                                      |                  |

|                                   |                                                   |
|-----------------------------------|---------------------------------------------------|
| Absorption coefficient            | 1.476 mm <sup>-1</sup>                            |
| F(000)                            | 464                                               |
| Crystal size                      | 0.300 x 0.200 x 0.020 mm <sup>3</sup>             |
| Theta range for data collection   | 5.281 to 69.492°.                                 |
| Index ranges                      | -10<=h<=10, -8<=k<=7, -18<=l<=16                  |
| Reflections collected             | 4316                                              |
| Independent reflections           | 1675 [R(int) = 0.0831]                            |
| Completeness to theta = 25.242°   | 99.9 %                                            |
| Refinement method                 | Full-matrix least-squares on F <sup>2</sup>       |
| Data/restraints/parameters        | 1675 / 0 / 147                                    |
| Goodness-of-fit on F <sup>2</sup> | 1.033                                             |
| Final R indexes [I>=2sigma(I)]    | R <sub>1</sub> = 0.0574, wR <sub>2</sub> = 0.1647 |
| Final R indexes (all data)        | R <sub>1</sub> = 0.0740, wR <sub>2</sub> = 0.1771 |
| Extinction coefficient            | 0.0021(12)                                        |
| Largest diff. peak and hole       | 0.254 and -0.280 e.Å <sup>-3</sup>                |

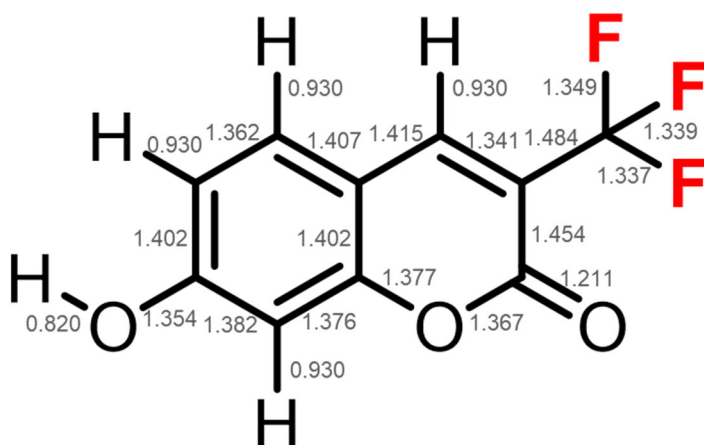

**Figure S10.** Bond Length of **5a**.

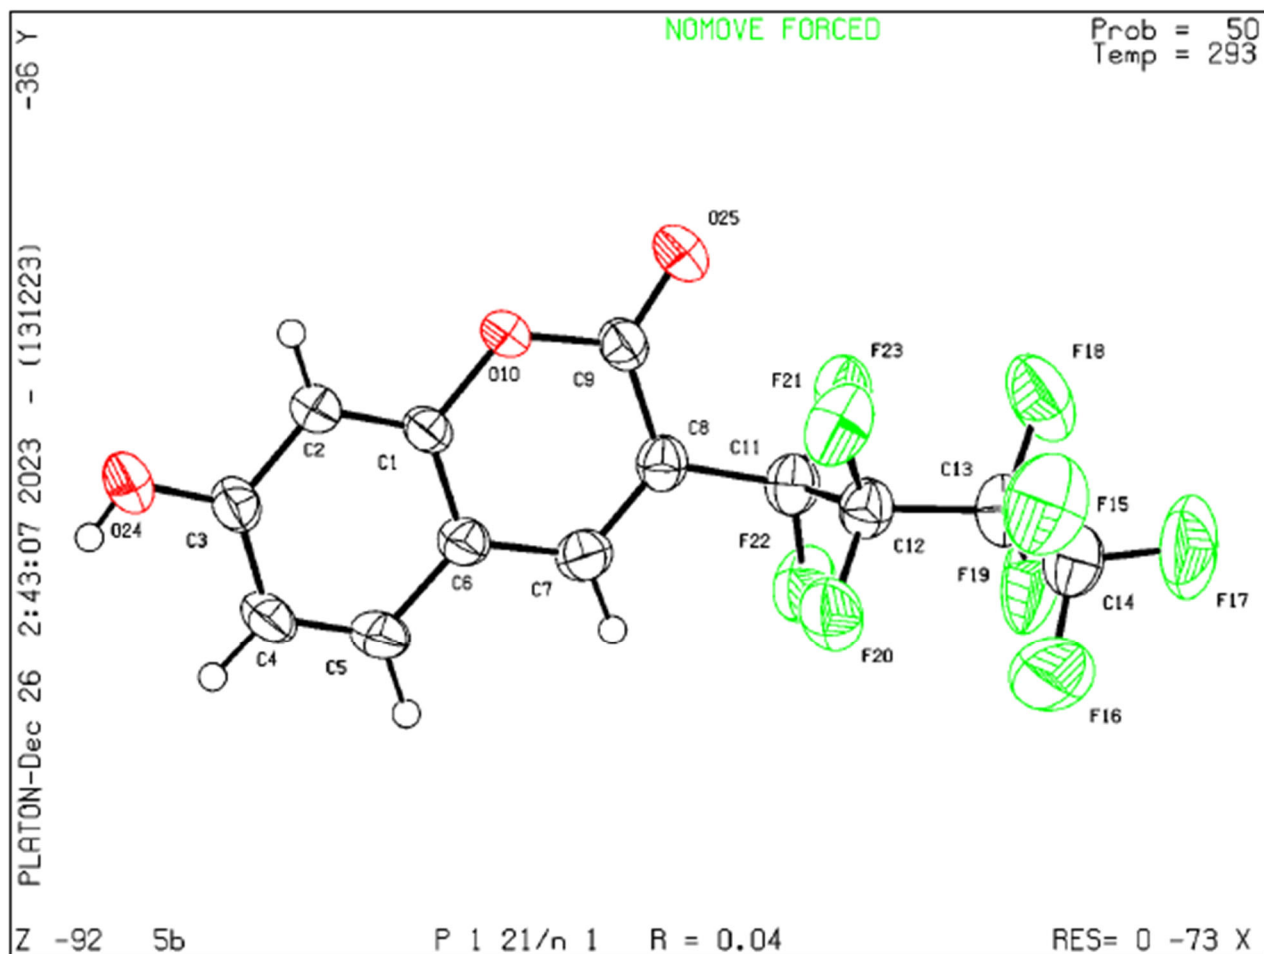

**Figure S11.** ORTEP diagram of **5b**.

A crystal of the **5b** was precipitated by using the solvent evaporation method with hexane and chloroform in freezer.

The X-ray Crystal Structure was collected on Rigaku Oxford Diffraction. The thermal ellipsoids are drawn at the 50 % probability level.

**Table S6.** Crystal data and structure refinement for **5b**.

|                      |                                                              |                  |
|----------------------|--------------------------------------------------------------|------------------|
| Identification code  | <b>5b</b>                                                    |                  |
| Empirical formula    | C <sub>13</sub> H <sub>5</sub> F <sub>9</sub> O <sub>3</sub> |                  |
| Formula weight       | 380.17                                                       |                  |
| Temperature          | 293(2) K                                                     |                  |
| Wavelength           | 1.54184 Å                                                    |                  |
| Crystal system       | monoclinic                                                   |                  |
| Space group          | P2 <sub>1</sub> /n                                           |                  |
| Unit cell dimensions | a = 13.9448(2) Å                                             | α = 90°.         |
|                      | b = 5.92150(10) Å                                            | β = 106.068(2)°. |
|                      | c = 16.9008(3) Å                                             | γ = 90°.         |
| Volume               | 1341.05(4) Å <sup>3</sup>                                    |                  |
| Z                    | 4                                                            |                  |
| Density (calculated) | 1.883 Mg/m <sup>3</sup>                                      |                  |

|                                   |                                                   |
|-----------------------------------|---------------------------------------------------|
| Absorption coefficient            | 1.958 mm <sup>-1</sup>                            |
| F(000)                            | 752                                               |
| Crystal size                      | 0.200 x 0.100 x 0.050 mm <sup>3</sup>             |
| Theta range for data collection   | 3.649 to 69.679°.                                 |
| Index ranges                      | -16<=h<=13, -7<=k<=6, -19<=l<=20                  |
| Reflections collected             | 6943                                              |
| Independent reflections           | 2493 [R(int) = 0.0170]                            |
| Completeness to theta = 25.242°   | 99.8 %                                            |
| Refinement method                 | Full-matrix least-squares on F <sup>2</sup>       |
| Data/restraints/parameters        | 2493 / 0 / 247                                    |
| Goodness-of-fit on F <sup>2</sup> | 1.082                                             |
| Final R indexes [I>=2sigma(I)]    | R <sub>1</sub> = 0.0436, wR <sub>2</sub> = 0.1114 |
| Final R indexes (all data)        | R <sub>1</sub> = 0.0406, wR <sub>2</sub> = 0.1141 |
| Extinction coefficient            | 0.0041(4)                                         |
| Largest diff. peak and hole       | 0.307 and -0.375 e.Å <sup>-3</sup>                |

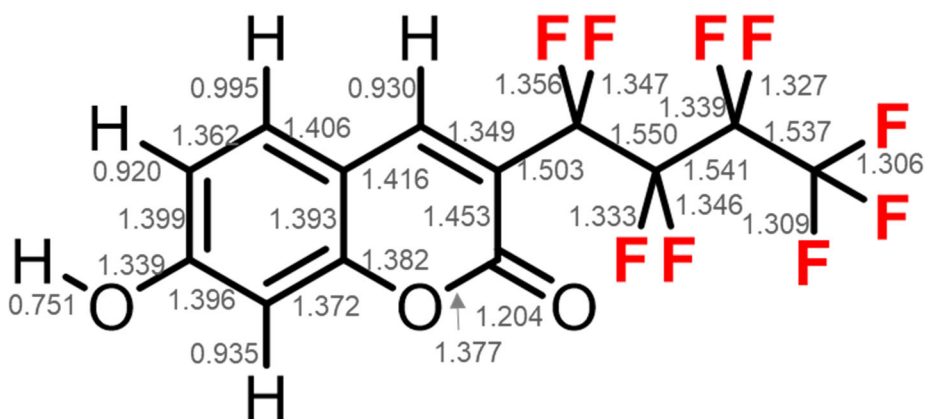

Figure S12. Bond Length of 5b.

## Computational Details

All calculations were performed using the computational chemistry software package Gaussian 16 ver. B.01. Computational resources in the form of super computers were provided by the Institute for Molecular Science.

### a) Ground State Details.

Ground state geometries of **1**, **2**, **4a**, **4b**, **5a**, **5b**, **anion of 5b** were computed at RB3LYP/6-31G(d,p) level of theory. At the optimized structures, no imaginary frequency was found through the frequency analysis. All coordinates are reported as XYZ Cartesian coordinates. And computed E (RB3LYP) and sum of zero-point and thermal correction energies of optimized structures are shown.

#### 1

E (RB3LYP) = -572.254342231 a.u.

Sum of electronic and thermal Energies = -572.113830 a.u.

Imaginary Frequency = 0

**Table 7.** Cartesian coordinates of the optimized **1**.

| Coordinates (Angstroms) |           |           |           |
|-------------------------|-----------|-----------|-----------|
| Atom                    | X         | Y         | Z         |
| C                       | 2.357504  | -0.422859 | 0.000077  |
| C                       | 1.150782  | -1.122996 | -0.000089 |
| C                       | -0.041411 | -0.405515 | -0.000104 |
| C                       | -0.05903  | 1.006298  | -0.000024 |
| C                       | 1.174114  | 1.681395  | 0.000071  |
| C                       | 2.371558  | 0.985036  | 0.000095  |
| H                       | 1.140261  | -2.206036 | -0.000323 |
| C                       | -1.341832 | 1.65471   | -0.000074 |
| H                       | 1.179863  | 2.767666  | 0.00007   |
| H                       | 3.318591  | 1.518471  | 0.000213  |
| C                       | -2.485426 | 0.930996  | -0.000076 |
| C                       | -2.466721 | -0.526283 | 0.000022  |
| H                       | -1.377232 | 2.741495  | -0.000081 |
| H                       | -3.467725 | 1.386951  | -0.000057 |
| O                       | -1.198917 | -1.12447  | -0.000242 |
| O                       | -3.428557 | -1.256349 | 0.000288  |
| O                       | 3.500466  | -1.159748 | 0.000112  |
| H                       | 4.265074  | -0.568697 | -0.000483 |

#### 2

E (RB3LYP) = -842.617933605 a.u.

Sum of electronic and thermal Energies = -842.361982 a.u.

Imaginary Frequency = 0

**Table 8.** Cartesian coordinates of the optimized **2**.

| Coordinates (Angstroms) |           |           |           |
|-------------------------|-----------|-----------|-----------|
| Atom                    | X         | Y         | Z         |
| C                       | -0.156338 | 0.400026  | 0.003709  |
| C                       | -1.10671  | -0.616139 | -0.147029 |
| C                       | -2.456735 | -0.299711 | -0.07627  |
| C                       | -2.895858 | 1.024692  | 0.144634  |
| C                       | -1.920354 | 2.023312  | 0.290619  |
| C                       | -0.565141 | 1.730795  | 0.222852  |
| H                       | -0.790062 | -1.637899 | -0.31747  |
| C                       | -4.31378  | 1.253965  | 0.20275   |
| H                       | -2.239614 | 3.048036  | 0.459373  |
| H                       | 0.160231  | 2.525947  | 0.335847  |
| C                       | -5.188046 | 0.232244  | 0.051041  |
| C                       | -4.734231 | -1.134653 | -0.175995 |
| H                       | -4.672402 | 2.266558  | 0.371402  |
| H                       | -6.261742 | 0.368665  | 0.089092  |
| O                       | -3.347115 | -1.322025 | -0.227655 |
| O                       | -5.435697 | -2.107028 | -0.321499 |
| O                       | 1.139108  | 0.000251  | -0.082852 |
| C                       | 2.178521  | 0.967995  | 0.104206  |
| H                       | 2.113402  | 1.746548  | -0.666833 |
| H                       | 2.045922  | 1.452183  | 1.082824  |
| C                       | 3.51216   | 0.267012  | 0.034136  |
| C                       | 4.5586    | 0.818015  | -0.711208 |
| C                       | 3.731839  | -0.919144 | 0.745973  |
| C                       | 5.810953  | 0.201509  | -0.739511 |
| H                       | 4.394245  | 1.73259   | -1.275607 |
| C                       | 4.978421  | -1.540802 | 0.709946  |
| H                       | 2.917975  | -1.358355 | 1.314304  |
| C                       | 6.022661  | -0.979994 | -0.029739 |
| H                       | 6.615225  | 0.639716  | -1.323021 |
| H                       | 5.136595  | -2.463501 | 1.260541  |
| H                       | 6.994093  | -1.464801 | -0.055086 |

**4a**

E (RB3LYP) = -1179.222409 a.u.

Sum of electronic and thermal Energies = -1179.385708 a.u.

Imaginary Frequency = 0

**Table 9.** Cartesian coordinates of the optimized **4a**.

| Atom | Coordinates (Angstroms) |           |           |
|------|-------------------------|-----------|-----------|
|      | X                       | Y         | Z         |
| C    | -1.225393               | -0.358291 | 0.000051  |
| C    | -0.318949               | 0.709822  | -0.000085 |
| C    | 1.041835                | 0.441834  | -0.000035 |
| C    | 1.537756                | -0.880939 | 0.000139  |
| C    | 0.606435                | -1.93334  | 0.00028   |
| C    | -0.758201               | -1.690405 | 0.000238  |
| H    | -0.680396               | 1.730788  | -0.000221 |
| C    | 2.957652                | -1.058762 | 0.000173  |
| H    | 0.970639                | -2.956718 | 0.000419  |
| H    | -1.449678               | -2.522731 | 0.000365  |
| C    | 3.796063                | 0.007893  | 0.000005  |
| C    | 3.283287                | 1.380438  | -0.000274 |
| H    | 3.366086                | -2.064513 | 0.000337  |
| O    | 1.892094                | 1.50774   | -0.00015  |
| O    | 3.940387                | 2.390848  | -0.000547 |
| O    | -2.532889               | -0.006359 | -0.000013 |
| C    | -3.536587               | -1.040283 | 0.000133  |
| H    | -3.409378               | -1.669358 | -0.889713 |
| H    | -3.409355               | -1.669098 | 0.89016   |
| C    | -4.888961               | -0.380254 | 0.000062  |
| C    | -5.520413               | -0.058468 | -1.206735 |
| C    | -5.519899               | -0.057177 | 1.206787  |
| C    | -6.763391               | 0.573767  | -1.208505 |
| H    | -5.035319               | -0.304277 | -2.147843 |
| C    | -6.762866               | 0.575067  | 1.208407  |
| H    | -5.0344                 | -0.301981 | 2.147948  |
| C    | -7.386276               | 0.891013  | -0.000087 |
| H    | -7.245835               | 0.816532  | -2.150537 |
| H    | -7.244909               | 0.818845  | 2.150384  |



|   |           |           |          |
|---|-----------|-----------|----------|
| H | -8.355637 | 1.38059   | -0.00014 |
| C | 5.291402  | -0.160501 | 0.000027 |
| F | 5.860147  | 0.395272  | 1.086573 |
| F | 5.86015   | 0.394933  | -1.08669 |
| F | 5.627536  | -1.475136 | 0.000231 |

**4b**

E (RB3LYP) = -1892.98988872 a.u.

Sum of electronic and thermal Energies = -1892.680119 a.u.

Imaginary Frequency = 0

**Table 10.** Cartesian coordinates of the optimized **4b**.

| Atom | Coordinates (Angstroms) |           |           |
|------|-------------------------|-----------|-----------|
|      | X                       | Y         | Z         |
| C    | 3.588073                | 0.538135  | 0.413228  |
| C    | 2.763783                | -0.066329 | -0.540125 |
| C    | 1.396268                | 0.209217  | -0.50996  |
| C    | 0.827777                | 1.071783  | 0.445233  |
| C    | 1.687823                | 1.667324  | 1.395087  |
| C    | 3.040811                | 1.409665  | 1.385286  |
| H    | 3.138034                | -0.738723 | -1.300025 |
| C    | -0.581894               | 1.2888    | 0.382453  |
| H    | 1.266192                | 2.336141  | 2.139728  |
| H    | 3.712621                | 1.858663  | 2.10763   |
| C    | -1.352346               | 0.685908  | -0.563205 |
| C    | -0.765664               | -0.231678 | -1.542698 |
| H    | -1.044347               | 1.957187  | 1.101762  |
| O    | 0.624198                | -0.396658 | -1.451465 |
| O    | -1.338162               | -0.84724  | -2.405683 |
| O    | 4.925087                | 0.355692  | 0.493771  |
| C    | -2.840585               | 0.941619  | -0.608633 |
| C    | -3.688926               | -0.172983 | 0.074279  |
| C    | -5.197781               | 0.152736  | 0.261499  |
| C    | -6.073593               | -1.073388 | 0.63774   |
| F    | -3.12242                | 2.098462  | 0.076445  |
| F    | -3.277543               | 1.09941   | -1.881175 |
| F    | -3.167009               | -0.386127 | 1.312767  |

|   |           |           |           |
|---|-----------|-----------|-----------|
| F | -3.579227 | -1.313942 | -0.644182 |
| F | -5.703638 | 0.672409  | -0.880939 |
| F | -5.326204 | 1.061982  | 1.256047  |
| F | -5.536066 | -1.738286 | 1.670803  |
| F | -7.292871 | -0.644114 | 0.991699  |
| F | -6.197958 | -1.90533  | -0.401087 |
| C | 5.567457  | -0.5165   | -0.458961 |
| H | 5.132691  | -1.520344 | -0.378172 |
| H | 5.382463  | -0.139597 | -1.472442 |
| C | 7.04052   | -0.541464 | -0.154171 |
| C | 7.567737  | -1.498339 | 0.720425  |
| C | 7.897559  | 0.407549  | -0.723378 |
| C | 8.929703  | -1.508843 | 1.020385  |
| H | 6.908123  | -2.238093 | 1.166603  |
| C | 9.259665  | 0.399962  | -0.425047 |
| H | 7.494976  | 1.154     | -1.403181 |
| C | 9.77737   | -0.559134 | 0.447509  |
| H | 9.329025  | -2.25807  | 1.697375  |
| H | 9.916404  | 1.138576  | -0.874795 |
| H | 10.838693 | -0.568499 | 0.677445  |

### **5a**

E (RB3LYP) = -909.286327 a.u.

Sum of electronic and thermal Energies = -909.137437 a.u.

Imaginary Frequency = 0

**Table 11.** Cartesian coordinates of the optimized **5a**.

| Atom | Coordinates (Angstroms) |           |           |
|------|-------------------------|-----------|-----------|
|      | X                       | Y         | Z         |
| C    | -3.636882               | 0.031212  | 0.000109  |
| C    | -2.639022               | 1.007173  | -0.00016  |
| C    | -1.309302               | 0.601701  | -0.000216 |
| C    | -0.946907               | -0.762726 | -0.00018  |
| C    | -1.976701               | -1.721985 | -0.000047 |
| C    | -3.306101               | -1.339042 | 0.000117  |
| H    | -2.894725               | 2.059525  | -0.000522 |
| C    | 0.448889                | -1.079564 | -0.000266 |

|   |           |           |           |
|---|-----------|-----------|-----------|
| H | -1.715364 | -2.776069 | -0.000062 |
| H | -4.094348 | -2.087109 | 0.000419  |
| C | 1.388532  | -0.101155 | -0.000254 |
| C | 1.013896  | 1.3148    | -0.000365 |
| H | 0.756161  | -2.12064  | -0.000276 |
| O | -0.359457 | 1.577494  | -0.00054  |
| O | 1.765648  | 2.256391  | 0.00053   |
| O | -4.922444 | 0.464929  | 0.00052   |
| H | -5.522372 | -0.293016 | -0.000779 |
| C | 2.860266  | -0.41665  | 0.000061  |
| F | 3.064118  | -1.757929 | 0.00035   |
| F | 3.480378  | 0.080094  | -1.086601 |
| F | 3.480023  | 0.080525  | 1.086734  |

### **5b**

E (RB3LYP) = -1622.62543150 a.u.

Sum of electronic and thermal Energies = -1622.431104 a.u.

Imaginary Frequency = 0

**Table 12.** Cartesian coordinates of the optimized **5b**.

| Atom | Coordinates (Angstroms) |           |           |
|------|-------------------------|-----------|-----------|
|      | X                       | Y         | Z         |
| C    | 5.632637                | -0.321186 | -0.536778 |
| C    | 4.760888                | 0.768519  | -0.51228  |
| C    | 3.439333                | 0.560156  | -0.123947 |
| C    | 2.968357                | -0.716267 | 0.241698  |
| C    | 3.876341                | -1.796021 | 0.206284  |
| C    | 5.189422                | -1.610823 | -0.176213 |
| H    | 5.082566                | 1.76834   | -0.786463 |
| C    | 1.598049                | -0.826064 | 0.630432  |
| H    | 3.526452                | -2.785307 | 0.486111  |
| H    | 5.895973                | -2.431937 | -0.207879 |
| C    | 0.775523                | 0.256878  | 0.647336  |
| C    | 1.258728                | 1.579921  | 0.243463  |
| H    | 1.211091                | -1.795858 | 0.926507  |
| O    | 2.615306                | 1.640603  | -0.111172 |

|   |           |           |           |
|---|-----------|-----------|-----------|
| O | 0.62884   | 2.604632  | 0.186732  |
| O | 6.932946  | -0.205041 | -0.90231  |
| H | 7.130192  | 0.714258  | -1.128244 |
| C | -0.667457 | 0.110065  | 1.071991  |
| C | -1.664647 | 0.005817  | -0.121037 |
| C | -3.120258 | -0.389878 | 0.256525  |
| C | -4.156471 | -0.168779 | -0.878978 |
| F | -0.812143 | -1.055152 | 1.784432  |
| F | -1.054107 | 1.133088  | 1.871056  |
| F | -1.194336 | -0.949583 | -0.96801  |
| F | -1.693894 | 1.189025  | -0.775915 |
| F | -3.532657 | 0.332243  | 1.324004  |
| F | -3.143973 | -1.705035 | 0.575899  |
| F | -3.727772 | -0.722166 | -2.022755 |
| F | -5.313727 | -0.747131 | -0.529701 |
| F | -4.372467 | 1.135258  | -1.077564 |

**Anion of 5b**

E (RB3LYP) = -1622.09291922 a.u.

Sum of electronic and thermal Energies = -1621.912401 a.u.

Imaginary Frequency = 0

**Table .13** Cartesian coordinates of the optimized **anion of 5b**.

| Atom | Coordinates (Angstroms) |           |           |
|------|-------------------------|-----------|-----------|
|      | X                       | Y         | Z         |
| C    | 5.757587                | -0.338179 | -0.569435 |
| C    | 4.804107                | 0.760636  | -0.551783 |
| C    | 3.504887                | 0.569717  | -0.164055 |
| C    | 3.001263                | -0.706842 | 0.2457    |
| C    | 3.921448                | -1.801152 | 0.235299  |
| C    | 5.219761                | -1.638856 | -0.146957 |
| H    | 5.144948                | 1.744561  | -0.855413 |
| C    | 1.665724                | -0.79264  | 0.631876  |
| H    | 3.551883                | -2.778303 | 0.544908  |

|   |           |           |           |
|---|-----------|-----------|-----------|
| H | 5.916491  | -2.472894 | -0.15393  |
| C | 0.822288  | 0.31269   | 0.634735  |
| C | 1.304737  | 1.601575  | 0.188407  |
| H | 1.272397  | -1.753336 | 0.95321   |
| O | 2.653454  | 1.654354  | -0.172705 |
| O | 0.67535   | 2.640018  | 0.095052  |
| O | 6.949704  | -0.200479 | -0.916405 |
| C | -0.59996  | 0.171702  | 1.0523    |
| C | -1.619751 | 0.003137  | -0.117217 |
| C | -3.075459 | -0.371308 | 0.282625  |
| C | -4.117212 | -0.221296 | -0.858368 |
| F | -0.766464 | -0.971803 | 1.816522  |
| F | -1.042109 | 1.220696  | 1.807637  |
| F | -1.181278 | -1.000127 | -0.927955 |
| F | -1.675911 | 1.147735  | -0.841285 |
| F | -3.509787 | 0.407307  | 1.303788  |
| F | -3.113986 | -1.668706 | 0.676885  |
| F | -3.711819 | -0.847257 | -1.972867 |
| F | -5.280692 | -0.774855 | -0.466429 |
| F | -4.345766 | 1.066313  | -1.142415 |

## b) Excited State Calculation

Using the optimized geometry of the ground state ( $S_0$ ) in the case of **1, 2, 4a, 4b, 5a, 5b, anion of 5b** single point time dependent density functional theory (TD-DFT) calculations were performed using the UB3LYP/6-31+G(d,p) level of theory. The polarizable continuum model (PCM) was employed to take into account the effect of the polarity of MeOH and methanol for the **1, 2, 4a, 4b, 5a, 5b, anion of 5b**. The first excited states of **1, 2, 4a, 4b, 5a, 5b, anion of 5b** are reported below. In calculating 100 kinds of transitions, dominant UV-vis absorption peaks with significant and relevant oscillator strengths ( $f \geq 0.1$ ) are highlighted.

### 1 (methanol)

Excited State 3: 1.000-A 4.0350 eV 307.27 nm  $f=0.4276$   $\langle S^{*2} \rangle=0.000$

42A -> 43A 0.69270 ( $\pi$ HOMO- $\pi$ LUMO, 96.0% contribution)

42B -> 43B 0.69270 ( $\pi$ HOMO- $\pi$ LUMO, 96.0% contribution)

Excited State 16: 1.000-A 5.9191 eV 209.46 nm  $f=0.1903$   $\langle S^{*2} \rangle=0.000$

37A -> 43A 0.10365

39A -> 43A 0.49412

41A -> 44A -0.44843

41A -> 45A -0.12735

42A -> 45A 0.10574

37B -> 43B 0.10365

39B -> 43B 0.49412

41B -> 44B -0.44843

41B -> 45B -0.12735

42B -> 45B 0.10574

Excited State 23: 1.000-A 6.2600 eV 198.06 nm  $f=0.6432$   $\langle S^{*2} \rangle=0.000$

41A -> 44A -0.24963

41A -> 45A 0.58799

42A -> 43A -0.10001

42A -> 44A -0.16968

42A -> 45A -0.14911

41B -> 44B -0.24963

41B -> 45B 0.58799

42B -> 43B -0.10001

42B -> 44B -0.16968

42B -> 45B -0.14911

Excited State 26: 1.000-A 6.4166 eV 193.22 nm  $f=0.5184$   $\langle S^{*2} \rangle=0.000$

37A -> 44A -0.10185

39A -> 43A 0.36101

41A -> 44A 0.41476

41A -> 45A 0.26710

42A -> 45A 0.27403

37B -> 44B -0.10185

39B -> 43B 0.36101

41B -> 44B 0.41476

41B -> 45B 0.26710

42B -> 45B 0.27403

Excited State 98: 1.000-A 8.2899 eV 149.56 nm  $f=0.1534$   $\langle S^{*2} \rangle=0.000$

37A -> 44A 0.56132

41A -> 53A -0.10262

41A -> 56A 0.24319

42A -> 57A 0.24766

37B -> 44B 0.56132  
41B -> 53B -0.10262  
41B -> 56B 0.24319  
42B -> 57B 0.24766

## 2 (methanol)

**Excited State 4: 1.000-A 3.9599 eV 313.10 nm f=0.5497 <S\*\*2>=0.000**

**66A -> 67A 0.69517 ( $\pi$ HOMO- $\pi$ LUMO, 96.7% contribution)**  
**66B -> 67B 0.69517 ( $\pi$ HOMO- $\pi$ LUMO, 96.7% contribution)**

Excited State 31: 1.000-A 5.8380 eV 212.37 nm f=0.1274 <S\*\*2>=0.000

61A -> 67A -0.32916  
63A -> 69A 0.11711  
63A -> 70A -0.18388  
64A -> 68A -0.28316  
64A -> 71A -0.10490  
65A -> 68A 0.40732  
65A -> 69A -0.13368  
65A -> 71A -0.12143  
66A -> 71A 0.15736  
61B -> 67B -0.32916  
63B -> 69B 0.11711  
63B -> 70B -0.18388  
64B -> 68B -0.28316  
64B -> 71B -0.10490  
65B -> 68B 0.40732  
65B -> 69B -0.13368  
65B -> 71B -0.12143  
66B -> 71B 0.15736

Excited State 40: 1.000-A 6.1103 eV 202.91 nm f=0.1717 <S\*\*2>=0.000

63A -> 69A 0.16755  
63A -> 70A -0.13822  
64A -> 68A -0.15541  
64A -> 69A -0.16292  
64A -> 70A 0.44453  
65A -> 69A -0.17011  
65A -> 70A 0.36529  
65A -> 71A 0.12329  
63B -> 69B 0.16755  
63B -> 70B -0.13822  
64B -> 68B -0.15541  
64B -> 69B -0.16292  
64B -> 70B 0.44453  
65B -> 69B -0.17011  
65B -> 70B 0.36529  
65B -> 71B 0.12329

Excited State 44: 1.000-A 6.1708 eV 200.92 nm f=0.8025 <S\*\*2>=0.000

64A -> 68A -0.20118  
64A -> 69A -0.21266  
64A -> 70A -0.29417  
64A -> 71A 0.21093  
65A -> 68A -0.10002

|            |          |
|------------|----------|
| 65A -> 69A | -0.12780 |
| 65A -> 70A | -0.17057 |
| 65A -> 71A | 0.37549  |
| 66A -> 71A | -0.10223 |
| 66A -> 74A | 0.10146  |
| 64B -> 68B | -0.20118 |
| 64B -> 69B | -0.21266 |
| 64B -> 70B | -0.29417 |
| 64B -> 71B | 0.21093  |
| 65B -> 68B | -0.10002 |
| 65B -> 69B | -0.12780 |
| 65B -> 70B | -0.17057 |
| 65B -> 71B | 0.37549  |
| 66B -> 71B | -0.10223 |
| 66B -> 74B | 0.10146  |

Excited State 47: 1.000-A 6.3076 eV 196.56 nm f=0.5070 <S\*\*2>=0.000

|            |          |
|------------|----------|
| 61A -> 67A | -0.25930 |
| 63A -> 69A | -0.11232 |
| 64A -> 68A | 0.21789  |
| 64A -> 69A | 0.22238  |
| 64A -> 70A | 0.16086  |
| 64A -> 71A | 0.17940  |
| 65A -> 68A | 0.10540  |
| 65A -> 71A | 0.37297  |
| 66A -> 71A | 0.20310  |
| 61B -> 67B | -0.25930 |
| 63B -> 69B | -0.11232 |
| 64B -> 68B | 0.21789  |
| 64B -> 69B | 0.22238  |
| 64B -> 70B | 0.16086  |
| 64B -> 71B | 0.17940  |
| 65B -> 68B | 0.10540  |
| 65B -> 71B | 0.37297  |
| 66B -> 71B | 0.20310  |

Excited State 66: 1.000-A 6.6202 eV 187.28 nm f=0.4194 <S\*\*2>=0.000

|            |          |
|------------|----------|
| 62A -> 68A | -0.10531 |
| 63A -> 68A | -0.13257 |
| 63A -> 70A | 0.42952  |
| 63A -> 77A | -0.11251 |
| 64A -> 68A | -0.13054 |
| 64A -> 69A | 0.18832  |
| 65A -> 69A | -0.19417 |
| 65A -> 70A | 0.16610  |
| 65A -> 72A | -0.11522 |
| 65A -> 73A | 0.13287  |
| 62B -> 68B | -0.10531 |
| 63B -> 68B | -0.13257 |
| 63B -> 70B | 0.42952  |
| 63B -> 77B | -0.11251 |
| 64B -> 68B | -0.13054 |
| 64B -> 69B | 0.18832  |
| 65B -> 69B | -0.19417 |
| 65B -> 70B | 0.16610  |



65B -> 72B -0.11522  
65B -> 73B 0.13287

Excited State 70: 1.000-A 6.6969 eV 185.14 nm f=0.4269 <S\*\*2>=0.000

63A -> 68A -0.19915  
63A -> 69A 0.30511  
63A -> 70A -0.17517  
63A -> 72A 0.11776  
63A -> 73A -0.13516  
64A -> 68A 0.11274  
64A -> 70A -0.26021  
65A -> 69A 0.11518  
65A -> 70A 0.26597  
65A -> 74A 0.10926  
66A -> 76A 0.11246  
66A -> 77A -0.16960  
63B -> 68B -0.19915  
63B -> 69B 0.30511  
63B -> 70B -0.17517  
63B -> 72B 0.11776  
63B -> 73B -0.13516  
64B -> 68B 0.11274  
64B -> 70B -0.26021  
65B -> 69B 0.11518  
65B -> 70B 0.26597  
65B -> 74B 0.10926  
66B -> 76B 0.11246  
66B -> 77B -0.16960

#### **4a (methanol)**

**Excited State 4: 1.000-A 3.8449 eV 322.46 nm f=0.6088 <S\*\*2>=0.000**

**82A -> 83A 0.69615 ( $\pi$ HOMO- $\pi$ LUMO, 96.9% contribution)**  
**82B -> 83B 0.69615 ( $\pi$ HOMO- $\pi$ LUMO, 96.9% contribution)**

Excited State 33: 1.000-A 5.9350 eV 208.90 nm f=0.2195 <S\*\*2>=0.000

79A -> 84A 0.19370  
79A -> 86A 0.12906  
80A -> 86A -0.32353  
80A -> 87A 0.16599  
81A -> 85A 0.54596  
79B -> 84B 0.19370  
79B -> 86B 0.12906  
80B -> 86B -0.32353  
80B -> 87B 0.16599  
81B -> 85B 0.54596

Excited State 39: 1.000-A 6.0787 eV 203.96 nm f=0.8544 <S\*\*2>=0.000

79A -> 84A 0.41451  
79A -> 86A 0.25638  
79A -> 87A 0.19281  
80A -> 84A 0.19467  
80A -> 86A 0.32919  
82A -> 84A -0.15258  
82A -> 87A 0.13784  
79B -> 84B 0.41451

79B -> 86B 0.25638  
79B -> 87B 0.19281  
80B -> 84B 0.19467  
80B -> 86B 0.32919  
82B -> 84B -0.15258  
82B -> 87B 0.13784

Excited State 41: 1.000-A 6.2240 eV 199.20 nm f=0.2753 <S\*\*2>=0.000

77A -> 83A 0.15044  
79A -> 84A -0.28239  
79A -> 86A 0.56872  
79A -> 87A -0.10444  
80A -> 87A -0.10576  
77B -> 83B 0.15044  
79B -> 84B -0.28239  
79B -> 86B 0.56872  
79B -> 87B -0.10444  
80B -> 87B -0.10576

Excited State 50: 1.000-A 6.3032 eV 196.70 nm f=0.2001 <S\*\*2>=0.000

77A -> 83A 0.13284  
79A -> 84A -0.14145  
79A -> 87A 0.60628  
80A -> 86A -0.21165  
82A -> 84A -0.12562  
77B -> 83B 0.13284  
79B -> 84B -0.14145  
79B -> 87B 0.60628  
80B -> 86B -0.21165  
82B -> 84B -0.12562

Excited State 64: 1.000-A 6.6822 eV 185.55 nm f=0.3987 <S\*\*2>=0.000

74A -> 83A 0.15003  
79A -> 85A -0.14349  
80A -> 85A 0.34973  
80A -> 90A -0.10718  
81A -> 86A -0.30428  
81A -> 87A 0.32691  
82A -> 91A -0.17058  
74B -> 83B 0.15003  
79B -> 85B -0.14349  
80B -> 85B 0.34973  
80B -> 90B -0.10718  
81B -> 86B -0.30428  
81B -> 87B 0.32691  
82B -> 91B -0.17058

Excited State 65: 1.000-A 6.6980 eV 185.11 nm f=0.3882 <S\*\*2>=0.000

75A -> 83A 0.53764  
80A -> 86A 0.21020  
80A -> 87A -0.24086  
81A -> 85A 0.23351  
75B -> 83B 0.53764  
80B -> 86B 0.21020  
80B -> 87B -0.24086

81B -> 85B 0.23351

Excited State 68: 1.000-A 6.7188 eV 184.53 nm f=0.2068 <S\*\*2>=0.000

75A -> 83A 0.40521  
79A -> 86A 0.10877  
80A -> 86A -0.24881  
80A -> 87A 0.24131  
81A -> 85A -0.26519  
82A -> 92A -0.23374  
82A -> 95A -0.14208  
75B -> 83B 0.40521  
79B -> 86B 0.10877  
80B -> 86B -0.24881  
80B -> 87B 0.24131  
81B -> 85B -0.26519  
82B -> 92B -0.23374  
82B -> 95B -0.14208

#### **4b (methanol)**

Excited State 4: 1.000-A 3.7744 eV 328.48 nm f=0.6301 <S\*\*2>=0.000

118A ->119A 0.69578 ( $\pi$ HOMO- $\pi$ LUMO, 96.8% contribution)

118B ->119B 0.69578 ( $\pi$ HOMO- $\pi$ LUMO, 96.8% contribution)

Excited State 35: 1.000-A 5.9305 eV 209.06 nm f=0.4321 <S\*\*2>=0.000

115A ->120A 0.25453  
116A ->120A -0.13741  
116A ->121A -0.11782  
116A ->122A -0.29167  
116A ->123A -0.15959  
117A ->121A 0.50798  
115B ->120B 0.25453  
116B ->120B -0.13741  
116B ->121B -0.11782  
116B ->122B -0.29167  
116B ->123B -0.15959  
117B ->121B 0.50798

Excited State 37: 1.000-A 6.0165 eV 206.07 nm f=0.6604 <S\*\*2>=0.000

115A ->120A 0.48059  
115A ->122A -0.13307  
115A ->123A 0.13955  
116A ->122A 0.24796  
117A ->121A -0.17350  
118A ->120A 0.10884  
118A ->123A -0.19051  
118A ->126A 0.20260  
115B ->120B 0.48059  
115B ->122B -0.13307  
115B ->123B 0.13955  
116B ->122B 0.24796  
117B ->121B -0.17350  
118B ->120B 0.10884  
118B ->123B -0.19051  
118B ->126B 0.20260

Excited State 56: 1.000-A 6.4004 eV 193.71 nm f=0.3107 <S\*\*2>=0.000

|             |          |
|-------------|----------|
| 111A ->119A | -0.12521 |
| 113A ->119A | 0.11503  |
| 113A ->120A | -0.10271 |
| 115A ->120A | -0.23282 |
| 115A ->122A | -0.19109 |
| 115A ->123A | 0.36061  |
| 116A ->123A | -0.18026 |
| 118A ->126A | 0.34306  |
| 118A ->128A | 0.19039  |
| 111B ->119B | -0.12521 |
| 113B ->119B | 0.11503  |
| 113B ->120B | -0.10271 |
| 115B ->120B | -0.23282 |
| 115B ->122B | -0.19109 |
| 115B ->123B | 0.36061  |
| 116B ->123B | -0.18026 |
| 118B ->126B | 0.34306  |
| 118B ->128B | 0.19039  |

Excited State 71: 1.000-A 6.6624 eV 186.10 nm f=0.2290 <S\*\*2>=0.000

|             |          |
|-------------|----------|
| 116A ->121A | 0.27833  |
| 116A ->128A | 0.10006  |
| 117A ->122A | -0.23571 |
| 117A ->123A | -0.23731 |
| 118A ->129A | 0.37698  |
| 118A ->130A | -0.17433 |
| 118A ->132A | -0.18785 |
| 116B ->121B | 0.27833  |
| 116B ->128B | 0.10006  |
| 117B ->122B | -0.23571 |
| 117B ->123B | -0.23731 |
| 118B ->129B | 0.37698  |
| 118B ->130B | -0.17433 |
| 118B ->132B | -0.18785 |

Excited State 72: 1.000-A 6.6674 eV 185.96 nm f=0.1114 <S\*\*2>=0.000

|             |          |
|-------------|----------|
| 111A ->119A | 0.63818  |
| 113A ->120A | -0.14857 |
| 116A ->123A | -0.11146 |
| 111B ->119B | 0.63818  |
| 113B ->120B | -0.14857 |
| 116B ->123B | -0.11146 |

Excited State 73: 1.000-A 6.6969 eV 185.14 nm f=0.2642 <S\*\*2>=0.000

|             |          |
|-------------|----------|
| 116A ->121A | -0.26180 |
| 116A ->122A | -0.10772 |
| 116A ->125A | 0.13103  |
| 117A ->121A | -0.11296 |
| 117A ->122A | 0.22553  |
| 117A ->123A | 0.21571  |
| 118A ->128A | 0.10345  |
| 118A ->129A | 0.38987  |
| 118A ->130A | -0.12075 |

118A ->132A -0.13986  
 116B ->121B -0.26180  
 116B ->122B -0.10772  
 116B ->125B 0.13103  
 117B ->121B -0.11296  
 117B ->122B 0.22553  
 117B ->123B 0.21571  
 118B ->128B 0.10345  
 118B ->129B 0.38987  
 118B ->130B -0.12075  
 118B ->132B -0.13986

Excited State 75: 1.000-A 6.7168 eV 184.59 nm f=0.4855 <S\*\*2>=0.000

111A ->119A 0.12046  
 113A ->120A -0.16542  
 115A ->120A -0.10109  
 116A ->121A -0.12156  
 116A ->122A 0.32226  
 116A ->123A 0.29123  
 117A ->121A 0.31548  
 117A ->122A 0.11725  
 117A ->123A 0.10538  
 117A ->132A 0.11847  
 118A ->126A 0.10176  
 118A ->131A 0.15725  
 111B ->119B 0.12046  
 113B ->120B -0.16542  
 115B ->120B -0.10109  
 116B ->121B -0.12156  
 116B ->122B 0.32226  
 116B ->123B 0.29123  
 117B ->121B 0.31548  
 117B ->122B 0.11725  
 117B ->123B 0.10538  
 117B ->132B 0.11847  
 118B ->126B 0.10176  
 118B ->131B 0.15725

### **5a (methanol)**

Excited State 3: 1.000-A 3.9434 eV 314.41 nm f=0.4544 <S\*\*2>=0.000

**58A -> 59A 0.69128 ( $\pi$ HOMO- $\pi$ LUMO, 95.6% contribution)**

**58B -> 59B 0.69128 ( $\pi$ HOMO- $\pi$ LUMO, 95.6% contribution)**

Excited State 14: 1.000-A 5.8547 eV 211.77 nm f=0.1475 <S\*\*2>=0.000

53A -> 59A 0.11710  
 55A -> 59A 0.51332  
 57A -> 60A -0.37565  
 57A -> 61A -0.16913  
 58A -> 60A -0.11492  
 58A -> 61A 0.17517  
 53B -> 59B 0.11710  
 55B -> 59B 0.51332  
 57B -> 60B -0.37565  
 57B -> 61B -0.16913

58B -> 60B -0.11492  
58B -> 61B 0.17517

Excited State 20: 1.000-A 6.1679 eV 201.01 nm f=0.7273 <S\*\*2>=0.000

57A -> 60A -0.36595  
57A -> 61A 0.50968  
58A -> 59A -0.10748  
58A -> 60A -0.16737  
58A -> 61A -0.21476  
57B -> 60B -0.36595  
57B -> 61B 0.50968  
58B -> 59B -0.10748  
58B -> 60B -0.16737  
58B -> 61B -0.21476

Excited State 23: 1.000-A 6.3976 eV 193.80 nm f=0.4636 <S\*\*2>=0.000

55A -> 59A 0.29252  
57A -> 60A 0.39497  
57A -> 61A 0.38184  
58A -> 60A -0.13612  
58A -> 61A 0.21243  
58A -> 66A -0.14130  
55B -> 59B 0.29252  
57B -> 60B 0.39497  
57B -> 61B 0.38184  
58B -> 60B -0.13612  
58B -> 61B 0.21243  
58B -> 66B -0.14130

Excited State 100: 1.000-A 8.3368 eV 148.72 nm f=0.1121 <S\*\*2>=0.000

53A -> 60A 0.64380  
58A -> 76A -0.11043  
53B -> 60B 0.64380  
58B -> 76B -0.11043

### 5b (methanol)

Excited State 3: 1.000-A 3.8681 eV 320.53 nm f=0.4899 <S\*\*2>=0.000

94A -> 95A 0.69054 ( $\pi$ HOMO- $\pi$ LUMO, 95.4% contribution)  
94B -> 95B 0.69054 ( $\pi$ HOMO- $\pi$ LUMO, 95.4% contribution)

Excited State 14: 1.000-A 5.7908 eV 214.10 nm f=0.1397 <S\*\*2>=0.000

89A -> 95A 0.11733  
91A -> 95A 0.52727  
93A -> 96A 0.32421  
93A -> 97A -0.14171  
94A -> 96A 0.16112  
94A -> 97A 0.20967  
89B -> 95B 0.11733  
91B -> 95B 0.52727  
93B -> 96B 0.32421  
93B -> 97B -0.14171  
94B -> 96B 0.16112  
94B -> 97B 0.20967

Excited State 21: 1.000-A 6.0778 eV 203.99 nm f=0.6625 <S\*\*2>=0.000  
91A -> 95A -0.12170  
93A -> 96A 0.46027  
93A -> 97A 0.33002  
94A -> 96A 0.11650  
94A -> 97A -0.20960  
94A -> 98A -0.18668  
94A ->100A 0.21255  
91B -> 95B -0.12170  
93B -> 96B 0.46027  
93B -> 97B 0.33002  
94B -> 96B 0.11650  
94B -> 97B -0.20960  
94B -> 98B -0.18668  
94B ->100B 0.21255

Excited State 23: 1.000-A 6.2189 eV 199.37 nm f=0.1213 <S\*\*2>=0.000  
91A -> 95A 0.12209  
93A -> 96A -0.13967  
93A -> 97A 0.48048  
94A -> 96A 0.11172  
94A ->100A -0.44410  
91B -> 95B 0.12209  
93B -> 96B -0.13967  
93B -> 97B 0.48048  
94B -> 96B 0.11172  
94B ->100B -0.44410

Excited State 31: 1.000-A 6.5249 eV 190.02 nm f=0.1291 <S\*\*2>=0.000  
91A -> 95A -0.13550  
93A -> 96A 0.20640  
93A -> 97A -0.18189  
94A ->100A -0.31430  
94A ->102A 0.48231  
94A ->103A 0.19090  
91B -> 95B -0.13550  
93B -> 96B 0.20640  
93B -> 97B -0.18189  
94B ->100B -0.31430  
94B ->102B 0.48231  
94B ->103B 0.19090

Excited State 34: 1.000-A 6.5517 eV 189.24 nm f=0.1498 <S\*\*2>=0.000  
91A -> 95A 0.14674  
93A -> 96A -0.22398  
93A -> 97A 0.18750  
94A ->100A 0.35932  
94A ->102A 0.43365  
94A ->103A 0.17695  
91B -> 95B 0.14674  
93B -> 96B -0.22398  
93B -> 97B 0.18750  
94B ->100B 0.35932  
94B ->102B 0.43365  
94B ->103B 0.17695

### Anion of 5b

**Excited State 2:** 1.000-A 3.3464 eV 370.50 nm f=0.6362 <S\*\*2>=0.000

94A -> 95A 0.69604 ( $\pi$ HOMO- $\pi$ LUMO, 96.9% contribution)

94B -> 95B 0.69604 ( $\pi$ HOMO- $\pi$ LUMO, 96.9% contribution)

Excited State 39: 1.000-A 5.9396 eV 208.74 nm f=0.2555 <S\*\*2>=0.000

92A -> 96A 0.56361

92A -> 97A 0.26843

92A ->100A 0.10673

93A -> 99A 0.16272

94A ->104A 0.16283

92B -> 96B 0.56361

92B -> 97B 0.26843

92B ->100B 0.10673

93B -> 99B 0.16272

94B ->104B 0.16283

Excited State 57: 1.000-A 6.3389 eV 195.59 nm f=0.1491 <S\*\*2>=0.000

92A -> 96A -0.14615

92A -> 97A 0.24117

92A -> 98A 0.50296

92A -> 99A 0.23875

93A ->101A -0.12080

94A ->109A -0.15192

92B -> 96B -0.14615

92B -> 97B 0.24117

92B -> 98B 0.50296

92B -> 99B 0.23875

93B ->101B -0.12080

94B ->109B -0.15192

Excited State 55: 1.000-A 6.3058 eV 196.62 nm f=0.1427 <S\*\*2>=0.000

92A -> 96A -0.17198

92A -> 97A 0.40966

92A -> 98A -0.30275

92A -> 99A -0.24092

92A ->100A 0.11406

93A ->101A -0.11625

94A ->108A -0.18768

92B -> 96B -0.17198

92B -> 97B 0.40966

92B -> 98B -0.30275

92B -> 99B -0.24092

92B ->100B 0.11406

93B ->101B -0.11625

94B ->108B -0.18768

Excited State 10: 1.000-A 4.4844 eV 276.48 nm f=0.1406 <S\*\*2>=0.000

92A -> 95A 0.13103

94A -> 96A 0.65050

94A -> 97A -0.20284

92B -> 95B 0.13103

94B -> 96B 0.65050



94B -> 97B -0.20284

Excited State 42: 1.000-A 6.0032 eV 206.53 nm f=0.1350 <S\*\*2>=0.000

92A -> 96A -0.19728

93A -> 98A -0.17568

93A -> 99A 0.49203

93A ->100A -0.18404

93A ->101A -0.23053

93A ->102A -0.18899

93A ->103A -0.20211

92B -> 96B -0.19728

93B -> 98B -0.17568

93B -> 99B 0.49203

93B ->100B -0.18404

93B ->101B -0.23053

93B ->102B -0.18899

93B ->103B -0.20211

Excited State 12: 1.000-A 4.7320 eV 262.01 nm f=0.1146 <S\*\*2>=0.000

94A -> 96A 0.21457

94A -> 97A 0.64996

94A -> 98A 0.12094

94B -> 96B 0.21457

94B -> 97B 0.64996

94B -> 98B 0.12094
